# Supplementary material for: Factors influencing antiretroviral treatment suboptimal adherence among perinatally HIV-infected adolescents in Thailand
Source: PubMed Central journal article supplement (PMC5312953; doi:10.1371/journal.pone.0172392), 2017-02-16
Supplement: pone.0172392.s001.pdf [file pone.0172392.s001.pdf]

**Institut National d'Etudes Démographiques, Paris**  
**Faculty of Associated Medical Sciences, Chiang Mai University, Chiang Mai**

# TEENAGERS QUESTIONNAIRE

## Girls

Self-administered

ID Number:

Date:        |\_\_|\_\_| day |\_\_|\_\_| month |\_2\_|\_5\_|\_5\_|\_ \_| yr

***Please introduce the study and ask for ascent***

Self administred :

With help:

Site: .....

Code : |\_\_|\_\_|

**YOU ARE LIVING IN AN ORPHANAGE**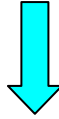

How old are you? |\_\_|\_\_|years old today

What is your date of birth  
(year that you were born) |\_\_|\_\_| |\_\_|\_\_| |\_\_|\_\_|\_\_|\_\_|  
Day Month Year

How many brothers and sisters do you have? |\_\_|sisters |\_\_| brothers

How many children are sharing the same bedroom including yourself? |\_\_|\_\_|

Among them, are there children you feel close to

- None
- One or two, only
- Three or four
- Many
- Most of them

How are the relations you have with the adult(s) in charge of you at the orphanage?

- Very good
- Good
- OK
- Difficult
- Very difficult

**NOW GO TO PAGE 4**

## YOU ARE LIVING IN A FAMILY/PRIVATE HOME

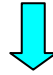

How old are you? |\_\_|\_\_|years old today

What is your date of birth  
(year that you were born) |\_\_|\_\_| |\_\_|\_\_| |\_\_|\_\_|\_\_|\_\_|

Day                      Month                      Year

At home, I live with  
(Relationship)

Nobody  **Go to Page 4**

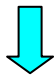

|         | I share my<br>bedroom with<br>her/him? | I feel close<br>to her/him?  |
|---------|----------------------------------------|------------------------------|
| 1. .... | <input type="checkbox"/> Yes           | <input type="checkbox"/> Yes |
| 2. .... | <input type="checkbox"/> Yes           | <input type="checkbox"/> Yes |
| 3. .... | <input type="checkbox"/> Yes           | <input type="checkbox"/> Yes |
| 4. .... | <input type="checkbox"/> Yes           | <input type="checkbox"/> Yes |
| 5. .... | <input type="checkbox"/> Yes           | <input type="checkbox"/> Yes |
| 6. .... | <input type="checkbox"/> Yes           | <input type="checkbox"/> Yes |
| 7. .... | <input type="checkbox"/> Yes           | <input type="checkbox"/> Yes |
| 8. .... | <input type="checkbox"/> Yes           | <input type="checkbox"/> Yes |

At home, who is looking after you the most? .....

Do you help with the household chores  
(*cleaning, shopping, cooking, etc.*)?

Yes often  
 Yes sometimes  
 Rarely  
 Not at all

Is there a particular task in the household  
that you are personally responsible for?  
(*watering the garden, washing, etc...*)?

No  
 Yes, what?.....

Do you regularly help the adults with their  
work (*in a shop, farm, etc.*)

No  
 Yes, what?.....

Is there somebody in the household that  
you regularly look after

No  
 Yes, who?.....

**SCHOOL**

Are you currently attending school?  Yes, what grade are you in? .....

No, in which grade did you stop .....

Do (or did) you like school?

Very much

A little

It is Ok

I don't like it

I don't like it at all

Do (or did) you skip (leave) school because you were ill?

Yes regularly

Yes for a long time

Sometimes

Rarely

What kind of student are (or were) you?

Very good

Good

Fair

Bad

Very bad

Do (or did) you have friends at school?

A lot

Some

2 or 3

None

**WORK**

Do you regularly work for money?

No       Yes

What do you do ? .....

How many days a week do you work? |\_\_|

How much do you earn? |\_\_|\_\_|\_\_|\_\_| per day  
or  
|\_\_|\_\_|\_\_|\_\_| per month

Do you give money to your household  No  
 Sometimes  
 Regularly

Do you like your work ?  No       Yes

Do you get tired at work?  No       Yes

Do you have friends at work?  Many  
 Some  
 Few  
 None

**FUTURE**

Do you plan to go to college, vocational college, university?  No  
 Yes  
 Don't know

What subject would you like to study? .....  Don't know

What kind of occupation would you like to have, ideally? .....  Don't know

Do you think that you will get married or have a partner in the future?  No  
 Yes       Don't know

Do you think that you will get children in the future?  No  
 Yes       Don't know

Do you think that you will live outside your hometown in the future?  No  
 Yes       Don't know

**HEALTH**

How is your health at the moment?

- Very Good  
 Good  
 Fair  
 Poor  
 Very Poor

Compared to your friends, are you :

- | <b>Height</b>                    | <b>Weight</b>                     |
|----------------------------------|-----------------------------------|
| <input type="checkbox"/> Taller  | <input type="checkbox"/> Chubbier |
| <input type="checkbox"/> Average | <input type="checkbox"/> Average  |
| <input type="checkbox"/> Smaller | <input type="checkbox"/> Skinnier |

Have you been hospitalized  No  Yes

The last time, how old were you? |\_\_|\_\_|

 Don't remember

How long did you stay in hospital?

|\_\_|\_\_|months or |\_\_|\_\_|Days

Do you take regularly any treatment?

- No 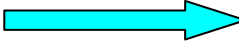 **go to page 8**  
 Yes

How old were you when you started treatment? |\_\_|\_\_|years old  Don't know

Do you have side effects from your treatment?

- No  
 Yes, specify:.....

Is somebody giving you your treatment?

- No, I take it by myself  
 Yes  
 Who ? .....

Is somebody reminding you to take your treatment?

- Never  
 Sometimes  
 Always } 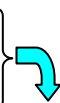  
 Who ? .....

Do you find it easy or difficult to remember to take your treatment?

- Very Easy  
 Easy  
 OK  
 Difficult  
 Very difficult

Do you use any tricks to prepare or remember to take your treatment on time? (tick all that apply)

- None  
 Clock/watch alarm  
 Cell phone alarm  
 National anthem  
 TV / radio program  
 Use pill box <sup>w</sup>/ compartments  
 Other: .....

During the last week (7 days), did you ever forget to take your treatment?

- Never  
 I forgot one dose  
 I forgot several doses  
 Don't know

If you ever forget to take your medication, what was the main reason?

- I was sick  
 I was playing  
 I was too busy  
 I was fed up  
 I was not at home  
 It was a festival/holidays  
 I was not given them  
 There wasn't enough privacy  
 Other reasons, specify: .....

Do you get scolded when you forget to take your treatment (*nurse, doctor, family*)?

- Yes  
 No

**REPRODUCTIVE HEALTH**

Have you already begun menstruation?  No  
 Yes, it started at |\_\_|\_\_| years old

Have you received any sexual education/family planning?  No  
 Yes

Where:  at school  
 in a children's camp  
 at the Hospital  
 At home  
 Others, specify: .....

Have you ever had sexual intercourse?  Don't want to answer **go to page 9**  
 No 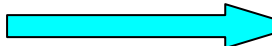 **go to page 9**  
 Yes, the first time at |\_\_|\_\_| years

↓  
 With whom was it the first time?  Spouse  Female CSW  
 Boy/girl friend  Male CSW  
 Occasional partner  
 Other (specify): .....  
 .....

Age of your partner at first sex |\_\_|\_\_| years  Don't know

Did you use a condom at this time?  No 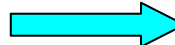  
 Yes

Did you use a contraception at this time?  No 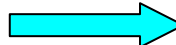 **go to page 9**

What kind of contraception?  Condom  
 Pill  
 Emergency pill  
 Withdraw  
 Other: .....



## SIGNIFICANT OTHERS

You share affection and support with different persons

In general, with whom do most share these types of moments?

(they can be family members or others)

|                                                                    | <i>Never</i>             | <i>Relationship</i><br><i>(for exemple uncle,<br/>older sister/brother.<br/>Don't give their name)</i> | <i>Nobo<br/>dy</i>       |
|--------------------------------------------------------------------|--------------------------|--------------------------------------------------------------------------------------------------------|--------------------------|
| I laugh and exchange jokes with                                    | <input type="checkbox"/> | 1.....<br>2.....                                                                                       | <input type="checkbox"/> |
| I get cuddled by                                                   | <input type="checkbox"/> | 1.....<br>2.....                                                                                       | <input type="checkbox"/> |
| I chat over my affairs, boy-friend stories with                    | <input type="checkbox"/> | 1.....<br>2.....                                                                                       | <input type="checkbox"/> |
| When I have nightmares or frightening thoughts, I get comforted by | <input type="checkbox"/> | 1.....<br>2.....                                                                                       | <input type="checkbox"/> |
| When I am sick, I turn to                                          | <input type="checkbox"/> | 1.....<br>2.....                                                                                       | <input type="checkbox"/> |
| When I have problems at school or work, I discuss with             | <input type="checkbox"/> | 1.....<br>2.....                                                                                       | <input type="checkbox"/> |
| When I have money problems, I discuss issues with                  | <input type="checkbox"/> | 1.....<br>2.....                                                                                       | <input type="checkbox"/> |
| I get information about my health, illness or medication from      | <input type="checkbox"/> | 1.....<br>2.....                                                                                       | <input type="checkbox"/> |
| If I do something wrong, I can confide in                          | <input type="checkbox"/> | 1.....<br>2.....                                                                                       | <input type="checkbox"/> |
| If somebody does something bad to me, I can confide in             | <input type="checkbox"/> | 1.....<br>2.....                                                                                       | <input type="checkbox"/> |
| I discuss about the future with                                    | <input type="checkbox"/> | 1.....<br>2.....                                                                                       | <input type="checkbox"/> |

**RELATIONSHIP WITH ADULTS**

How easy/difficult is it to ask any questions to the people at the hospital (nurses and doctors)?

- Very Easy  
 Easy  
 OK  
 Difficult  
 Very difficult

In the past year, did you have arguments with your caregiver or parents?

- Very often  
 Often  
 Sometimes  
 Rarely  
 Never

**YOUR PERSONALITY**

Do you think that you are generally

- Joyful  
 Intermediate  
 Sad  
 Up and down

Do you think that you are generally

- Lonely  
 Sociable/Friendly

Do you think that you are generally

- Always obese  
 Sometimes obese

How do you generally feel?

- Very unhappy  
 Unhappy  
 Average  
 Happy  
 Very happy

Do you have a special friend with whom you feel very close?

- No  
 Yes  boy  girl

Do you meet often?  Yes  No

Do you chat together on the internet or mobile phone?  Yes  No

**PEER GROUP**

Do you have a group of kids with whom you spend time?  No  Yes

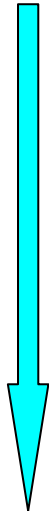

Where do they mostly come from?  School  
 Neighborhood  
 Family  
 Others

Are they  Mostly boys  
 Mostly girls  
 Equally boys and girls

What do you like to do most with your group of peers? .....

**GIRL/BOY FRIENDS/FAVORITE**

Do you have a boy/girl friend?  No  **GO TO PAGE 12**  
 Yes  boy  girl

Since you were |\_\_|\_\_| years old

Do you have sex together?  No  **GO TO PAGE 12**  
 Yes

The last time you had sex, did you use  No  
 Yes

Do you take contraception  No  **GO TO PAGE 12**  
 Yes

What kind of contraception?  Condom  
 Pill  
 Emergency pill  
 Injectable  
 Other: .....

Have you ever been pregnant?  <sub>2</sub> No  **GO TO PAGE 12**  
 <sub>1</sub> Yes

If yes, how old were **you**? |\_\_|\_\_| years old

If yes, how old was your partner? |\_\_|\_\_| years old

Did you  continue with the pregnancy  
 have an abortion

**ACTIVITIES**

Do you play computer games?  No  
 Sometimes  
 Regularly

Do you smoke cigarettes?  No  
 Sometimes  
 Regularly

Do you like riding motorbike very fast?  Don't know how to ride  
 No  
 Yes

Have you ever had a motorbike accident while you were driving?  No  
 Yes

Do you spend time chatting on the internet?  No  
 Sometimes  
 Often

Do you listen to music?  No  
 Sometimes  
 Often

Do you read books?  No  
 Sometimes  
 Often

Do you drink energizing drinks, like *Red-Bull*?  No  
 Sometimes  
 Often

Do you drink beer?  No  
 Sometimes  
 Often

Do you drink strong alcohol such as *Sangsom*?  No  
 Sometimes  
 Often

Have you ever been drunk?  No  
 Once  
 Sometimes  
 Often

Do you hang out with your friends?  No  
 Sometimes  
 Often

Where do you hang out?  At home  
 At my friends' house  
 At the mall  
 In the bar, restaurant, etc.  
 Outside such as parks, streets, stadium, etc...  
 Other: .....

Do you know people who take drugs?  No  
 Yes

Do you practice a sport  No  
 Sometimes  
 Regularly

Which sport? .....

Do you watch sport on TV?  No  
 Sometimes  
 Often

Was is your favorite sport? .....

|  |                                                                                      |
|--|--------------------------------------------------------------------------------------|
|  | Do you have a mobile phone? <input type="checkbox"/> Yes <input type="checkbox"/> No |
|--|--------------------------------------------------------------------------------------|

Do you watch soap operas on TV?  No  
 Sometimes  
 Often

What is your favorite soap series? .....

Do you do gardening?  No  
 Sometimes  
 Often

Do you do some cooking?  No  
 Sometimes  
 Often

Do you (have you) attend(ed)  
 extra-curriculum school  Yes  
 No

What is your religion?  I do not have a religion  
 Buddhist  
 Christian  
 Muslim  
 Other (specify: ..... )

When did you last go to the  
 Wat/Church/Mosque/Other?  Last week  
 Last month  
 Last 3 months  
 Last year  
 For festivals only  
 Not for a long time

**THANK YOU VERY MUCH FOR YOUR HELP !**
