# Supplementary material for: Factors influencing antiretroviral treatment suboptimal adherence among perinatally HIV-infected adolescents in Thailand
Source: PubMed Central journal article supplement (PMC5312953; doi:10.1371/journal.pone.0172392), 2017-02-16
Supplement: pone.0172392.s002.pdf [file pone.0172392.s002.pdf]

สถาบันการศึกษาประชากรแห่งชาติ ปารีส  
สถาบันวิจัยสังคม มหาวิทยาลัยเชียงใหม่ จังหวัดเชียงใหม่

แบบสอบถามสำหรับวัยรุ่น

พฤศจิกายน 2552

เด็กผู้หญิง

ตอบแบบสอบถามด้วยตนเอง

หมายเลขประจำตัว:

HN : .....

วันที่: ..... |\_\_|\_\_| |\_\_|\_\_| |2|5|\_\_|\_\_|  
วันที่ เดือน พ.ศ.

โปรดแนะนำโครงการวิจัยและสอบถามเพื่อขอความยินยอม

สามารถกรอกเองได้:

ต้องช่วยกรอก:

สถานที่วิจัย: .....

รหัส : |\_\_|\_\_|

ถ้าหนูอาศัยอยู่กับครอบครัว / อยู่บ้านส่วนตัว ให้กรอกข้อมูลหน้านี้

ปัจจุบันหนูอายุเท่าไร? |\_\_|\_\_|ปี

หนูเกิดวันที่เท่าไร (ปีที่หนูเกิด) |\_\_|\_\_| |\_\_|\_\_| |2|5|\_\_|\_\_|  
วันที่ เดือน พ.ศ.

หนูอาศัยอยู่กับใครบ้างที่บ้าน?

อยู่คนเดียว   **ข้ามไปหน้า 4**

ระบุความสัมพันธ์ เช่น พ่อแม่ ปู่ย่า ตายาย พี่น้อง ญาติ ฯลฯ

หนูนอนห้องเดียวกับเขาไหม?

หนูรู้สึกสนิทกับเขาไหม?

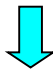

- 1. ....
- 2. ....
- 3. ....
- 4. ....
- 5. ....
- 6. ....
- 7. ....
- 8. ....

- 
- 
- 
- 
- 
- 
- 
- 

- 
- 
- 
- 
- 
- 
- 
- 

ผู้ที่ดูแลหนูใกล้ชิดมากที่สุดที่บ้านคือใคร.....

หนูช่วยงานบ้านหรือเปล่า (เช่น ช่วยทำความสะอาด ช่วยซื้อของ ช่วยทำอาหาร หรือ อื่นๆ)?

- ช่วยเป็นประจำ
- ช่วยเป็นบางครั้ง
- ช่วยบ้างเล็กน้อย
- ไม่เคยช่วยเลย

หนูมีงานบ้านที่ต้องรับผิดชอบหรือเปล่า? (เช่น รดน้ำต้นไม้ ล้างจาน หรืออื่นๆ)

- ไม่มี
- มี งานอะไร?.....

หนูได้ช่วยผู้ใหญ่ทำงานอะไรเป็นประจำหรือเปล่า? (ในร้าน ในไร่ นา สวน หรืออื่นๆ)

- ไม่มี
- มี งานอะไร?.....

หนูต้องดูแลใครในบ้านเป็นประจำหรือเปล่า

- ไม่มี
- มี ใคร?.....

## ที่โรงเรียน

- ปัจจุบันนี้หนูเรียนหนังสืออยู่หรือไม่  เรียน ชั้นไหน.....
- ไม่เรียน ได้เรียนสูงสุดถึงชั้นไหน.....

- หนูชอบเรียนหนังสือไหม?  ชอบมาก
- ชอบนิดหน่อย
- เฉยๆ
- ไม่ชอบ
- ไม่ชอบเลย

- หนูออกจากโรงเรียนหรือเคยหยุดเรียนเพราะหนูป่วยหรือเปล่า  ใช่ เป็นประจำ
- ใช่ นานมาแล้ว
- บางครั้ง
- นานๆจะมีครั้งหนึ่ง

- ผลการเรียนของหนูเป็นอย่างไร?  ดีมาก
- ดี
- ปานกลาง
- แย่
- แย่มาก

- หนูมีเพื่อนที่โรงเรียนไหม?  มีเยอะมาก
- มากกว่า 3 คน
- มี 2-3 คน
- ไม่มีเลย

ที่ทำงาน

หนูเคยทำงานที่ได้รับค่าจ้างบ้างหรือไม่?

ไม่ (ข้ามไปตอบตามลูกศร)

ใช่

หนูทำงานอะไร? .....

หนูทำงานสัปดาห์ละกี่วัน? |\_\_|

หนูได้เงินเท่าไร? ถ้าได้เป็นรายวัน |\_\_| |\_\_| |\_\_| ต่อวัน

ถ้าได้เป็นรายเดือน |\_\_| |\_\_| |\_\_| |\_\_| ต่อเดือน

หนูให้เงินช่วยเหลือค่าใช้จ่ายภายในบ้านบ้างหรือเปล่า?  ไม่

บางครั้ง

เป็นประจำ

หนูชอบงานที่หนูทำหรือเปล่า?  ไม่  ใช่

หนูทำงานเหนื่อยไหม?  ไม่  ใช่

หนูมีเพื่อนที่ทำงานหรือเปล่า?  มีมาก

มีพอสมควร

มีน้อย

ไม่มีเลย

อนาคต

หนูวางแผนเรียนต่อในระดับมหาวิทยาลัย/วิทยาลัย/อาชีวศึกษา  ไม่

หรือไม่?  ใช่

ไม่ทราบ

หนูต้องการเรียนเกี่ยวกับอะไร? .....  ไม่ทราบ

อาชีพที่หนูใฝ่ฝันคืออะไร? .....  ไม่ทราบ

ในอนาคตหนูคิดว่าจะแต่งงานหรือมีคู่ครองหรือไม่  ใช่

ไม่  หนูไม่แน่ใจ

ในอนาคต หนูต้องการที่จะมีลูกหรือไม่?  ใช่

ไม่  หนูไม่แน่ใจ

เมื่อหนูโตขึ้นหนูคิดที่จะย้ายไปอยู่ที่อื่นหรือไม่  ใช่

ไม่  ไม่แน่ใจ

สุขภาพ

- ตอนนี้สุขภาพของหนูเป็นยังไงบ้าง?
- ดีมาก
  - ดี
  - ปานกลาง
  - แย่
  - แย่มาก

- เมื่อเทียบกับเพื่อนๆ หนูเป็นอย่างไร
- |                          |                |                          |                |
|--------------------------|----------------|--------------------------|----------------|
|                          | <b>ส่วนสูง</b> | <b>น้ำหนัก</b>           |                |
| <input type="checkbox"/> | สูงกว่า        | <input type="checkbox"/> | อ้วนกว่า       |
| <input type="checkbox"/> | ตามเกณฑ์เฉลี่ย | <input type="checkbox"/> | ตามเกณฑ์เฉลี่ย |
| <input type="checkbox"/> | เตี้ยกว่า      | <input type="checkbox"/> | ผอมกว่า        |

- หนูเคยนอนโรงพยาบาลหรือไม่  ไม่เคย (ข้ามไปตอบตามลูกศร)  
 เคย

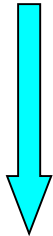

ตอนที่หนูเข้าโรงพยาบาลครั้งล่าสุด หนูอายุเท่าไร? |\_\_|\_\_| ปี  
 หนูอยู่โรงพยาบาลนานแค่ไหน? |\_\_|\_\_| เดือน |\_\_|\_\_| วัน

- หนูกินยาหรือได้รับการรักษาใดๆอย่างประจำสม่ำเสมอหรือไม่?  ไม่ 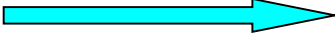 ไปหน้าที่ 8  
 ใช่

หนูเริ่มกินยา เมื่ออายุเท่าไร? |\_\_|\_\_| ปี  จำไม่ได้

- หนูมีผลข้างเคียงจากการกินยาหรือไม่  ไม่  
 ใช่ (ระบุ): .....

- มีใครช่วยเอายาให้หนูกินไหม?  ไม่ หนูกินยาเอง  
 มี ใคร? .....

- มีใครคอยเตือนให้หนูกินยาไหม?  ไม่มี  
 มี เป็นบางครั้ง ใคร?.....  
 มีคนคอยเตือนเป็นประจำ ใคร?.....

- หนูคิดว่าเป็นเรื่องง่ายหรือยากในการจำว่าต้องกินยา?  ง่ายมาก  
 ง่าย  
 ธรรมดา  
 ยาก  
 ยากมาก

- หนูใช้วิธีใดในการเตรียมหรือเตือนความจำเพื่อให้หนูกินยาได้ตรงเวลา?  
 (ทำเครื่องหมายถูกหน้าคำตอบได้มากกว่า 1 ข้อ)
- ไม่มี
  - ใช้ดูเวลาจากนาฬิกา
  - ใช้เสียงเตือนจากนาฬิกาปลุก
  - ใช้เสียงเตือนจากโทรศัพท์มือถือ
  - ใช้เสียงเพลงชาติ
  - ใช้เสียงเตือนจากรายการโทรทัศน์ / วิทยุ
  - ใช้กล่องยาที่มีช่องแบ่งยา
  - อื่นๆ: .....

- ช่วงสัปดาห์ที่แล้ว (7 วัน) หนูเคยลืมกินยาหรือเปล่า?  ไม่เคย  
 เคย 1 ครั้ง  
 เคยหลายครั้ง  
 ไม่รู้

- เมื่อหนูลืมกินยา อะไรเป็นเหตุผลสำคัญที่ทำให้ลืม ?  ป่วย  
 เล่นจนเพลิน  
 ช่างมาก  
 รู้สึกเบื่อหน่าย  
 ไม่อยู่บ้าน  
 เป็นช่วงเทศกาล / วันหยุด  
 ไม่มีใครเอายาให้หนูกิน  
 ไม่มีความเป็นส่วนตัวเพียงพอ/กลัวว่าคนอื่นจะเห็น  
 เหตุผลอื่นๆ ระบุ:.....  
 .....

- เวลาที่หนูลืมกินยาหนูเคยโดนตำหนิหรือเปล่า?  เคย  
 ไม่เคย  
 (เช่น จากพยาบาล / หมอ / สมาชิกในครอบครัว)

อนามัยเจริญพันธุ์

หนูมีประจำเดือนหรือยัง?

- ยังไม่มี
- มี เมื่ออายุ |\_\_|\_\_| ปี

หนูเคยได้รับความรู้หรือได้รับการอบรมเรื่องเพศศึกษา/การวางแผนครอบครัวหรือไม่?

- ไม่เคย
- เคย

ถ้าเคยได้รับการอบรม จากที่ไหน

- ที่โรงเรียน
- ในค่ายของเยาวชน
- ที่โรงพยาบาล
- ที่บ้าน
- อื่นๆ ระบุ: .....

หนูเคยมีเพศสัมพันธ์หรือเปล่า?

- ไม่ขอตอบคำถามนี้ 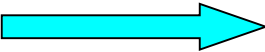 ไปหน้าที่ 9
- ไม่เคย  ไปหน้าที่ 9
- เคย ครั้งแรกเมื่ออายุ |\_\_|\_\_| ปี

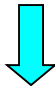

กับใคร?

- คู่ครอง
- แฟน
- คู่นอนชั่วคราว
- ถูกข่มขืน
- อื่นๆ (ระบุ): .....

- หญิงขายบริการ
- ชายขายบริการ

อายุของกลุ่มนอนในการมีเพศสัมพันธ์ครั้งแรก

- |\_\_|\_\_| ปี
- ไม่ทราบ

หนูใช้ถุงยางอนามัยในเพศสัมพันธ์ครั้งแรกหรือเปล่า?

- ไม่ใช่
- ใช่

หนูใช้วิธีการคุมกำเนิดในเพศสัมพันธ์ครั้งแรกหรือเปล่า?

- ไม่ใช่ 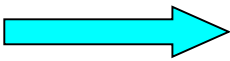 ไปหน้าที่ 9
- ใช่

หนูใช้การคุมกำเนิดวิธีไหนในการมีเพศสัมพันธ์ครั้งแรก?

- ถุงยางอนามัย
- ยาเม็ดคุมกำเนิด
- ยาเม็ดคุมกำเนิดแบบฉุกเฉิน
- หลั่งข้างนอก
- อื่นๆ: .....

**คำถามอื่น ๆ ที่สำคัญ**

การแบ่งปันความรักและการได้รับการช่วยเหลือ

โดยปกติแล้วหนูได้แบ่งปันช่วงเวลาสำคัญเหล่านี้กับใครมากที่สุด?  
(อาจเป็นสมาชิกในครอบครัว หรือผู้อื่นก็ได้)

ไม่เคย  
เกิดขึ้น

ความสัมพันธ์  
(เช่น พี่ ป้า น้า อา)

ไม่มีใคร

ไม่ต้องระบุชื่อ

หนูหัวเราะและพูดคุยเรื่องตลกกับ

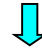

1.....  
2.....

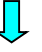



หนูได้รับการกอดโดย

1.....  
2.....



หนูพูดคุยเรื่องแฟน เรื่องความรัก ของหนูกับ

1.....  
2.....



เวลาฝันร้ายหรือมีความกลัวเกิดขึ้น หนูได้รับการปลอบโยนจาก

1.....  
2.....



เวลาหนูป่วย หนูขอความช่วยเหลือจาก

1.....  
2.....



เวลาหนูมีปัญหาที่โรงเรียนหรือปัญหาด้านการทำงาน หนูปรึกษากับ

1.....  
2.....



เวลาหนูมีปัญหาเรื่องเงิน หนูปรึกษากับ

1.....  
2.....



หนูได้รับข้อมูลเกี่ยวกับเรื่องการเจ็บป่วยของหนูหรือเรื่องยาจาก

1.....



|                                                            |        |                          |
|------------------------------------------------------------|--------|--------------------------|
|                                                            | 2..... |                          |
| เมื่อหนูทำบางสิ่งบางอย่างผิดพลาด หนูสามารถบอกความลับนี้กับ | 1..... |                          |
| <input type="checkbox"/>                                   | 2..... | <input type="checkbox"/> |
| เมื่อมีคนทำสิ่งไม่ดีกับหนู หนูสามารถบอกเรื่องนี้กับ        | 1..... |                          |
| <input type="checkbox"/>                                   | 2..... | <input type="checkbox"/> |
| หนูปรึกษาเรื่องอนาคตกับ                                    | 1..... |                          |
| <input type="checkbox"/>                                   | 2..... | <input type="checkbox"/> |

**ความสัมพันธ์กับเจ้าหน้าที่โรงพยาบาล**

|                                                        |                          |         |
|--------------------------------------------------------|--------------------------|---------|
| การพูดคุยกับเจ้าหน้าที่โรงพยาบาล (เช่นพยาบาล และแพทย์) | <input type="checkbox"/> | ง่ายมาก |
| มีความง่าย หรือยากอย่างไร?                             | <input type="checkbox"/> | ง่าย    |
|                                                        | <input type="checkbox"/> | ปานกลาง |
|                                                        | <input type="checkbox"/> | ยาก     |
|                                                        | <input type="checkbox"/> | ยากมาก  |

## ความสัมพันธ์กับผู้ใหญ่

การพูดคุยกับพ่อแม่ผู้ปกครองมีความง่าย หรือยากอย่างไร?  ง่ายมาก  
 ง่าย  
 ปานกลาง  
 ยาก  
 ยากมาก

ในปีที่ผ่านมา หนูได้มีการโต้เถียงกับผู้ดูแล หรือพ่อแม่ของหนูหรือไม่?  บ่อยมาก  
 บ่อย  
 บางครั้ง  
 นาน ๆ ครั้ง  
 ไม่เคย

## บุคลิกภาพของหนู

โดยทั่วไปหนูคิดว่าหนูเป็นคน  ร่าเริง  
 เฉยๆ  
 เศร้า  
 อารมณ์เปลี่ยนแปลงง่าย

โดยทั่วไปหนูคิดว่าหนูเป็นคน  ชอบอยู่คนเดียว เก็บตัว  
 ชอบเข้าสังคม มีมนุษยสัมพันธ์ดี

โดยทั่วไปหนูคิดว่าหนูเป็นคน  เชื่อฟังผู้ใหญ่เสมอ  
 เชื่อฟังผู้ใหญ่เป็นบางครั้ง

โดยทั่วไปหนูรู้สึกอย่างไร  ไม่มีความสุขเลย  
 มีความสุขเล็กน้อย  
 มีความสุขปานกลาง  
 มีความสุขมาก  
 มีความสุขมากที่สุด

หนูมีเพื่อนสนิทหรือไม่?  ไม่มี  
 มี  เป็นผู้ชาย  เป็นผู้หญิง

หนูกับเพื่อนสนิทพบกันบ่อยหรือไม่?  ใช่  ไม่ใช่

หนูได้คุย (แชท)  ใช่  ไม่ใช่

กับเพื่อนสนิททางอินเทอร์เน็ตหรือทางมือถือหรือไม่?

**เพื่อนในกลุ่ม**

หนูได้ใช้เวลาอยู่กับกลุ่ม  ไม่ใช่  
เพื่อนๆหรือไม่  ใช่

กลุ่มเพื่อนส่วนใหญ่เป็นเพื่อนจากที่ใด  จากโรงเรียน  
 เพื่อนแถวบ้าน  
 ญาติพี่น้องรุ่นเดียวกัน  
 อื่นๆ ระบุ.....

เพื่อนในกลุ่มส่วนใหญ่เป็นเพศใด  ส่วนมากเป็นผู้ชาย  
 ส่วนมากเป็นผู้หญิง  
 ผู้ชายและหญิงเท่าๆ กัน

ส่วนใหญ่แล้วชอบทำกิจกรรมใดมากที่สุดในกลุ่มเพื่อน .....

**แฟน**

หนูมีแฟนหรือยัง?  ไม่มี **ไปหน้าที่ 12**  
 มี เป็น  ผู้ชาย  ผู้หญิง

หนูมีแฟนตั้งแต่อายุ |\_\_|\_\_| ปี

หนูมีเพศสัมพันธ์กับแฟนหรือไม่?  ไม่มี **ไปหน้าที่ 12**  
 มี

ครั้งสุดท้ายที่มีเพศสัมพันธ์กัน หนูได้ใช้การคุมกำเนิดใดๆหรือไม่?  ไม่ **ไปหน้าที่ 12**  
 ใช่

หนูใช้วิธีการคุมกำเนิดอะไร?  ถุงยางอนามัย  
 ยาเม็ดคุมกำเนิดแบบฉุกเฉิน  
 ยาเม็ดคุมกำเนิด  
 ยาคุมกำเนิดชนิดฉีด  
 อื่นๆ: .....

หนูเคยตั้งท้องหรือไม่?  ไม่ **ไปหน้าที่ 12**  
 ใช่

ถ้าเคย ตอนนั้นหนูอายุเท่าไร? |\_\_|\_\_| ปี

ถ้าเคย ตอนนั้นแฟนหนูอายุเท่าไร? |\_\_|\_\_| ปี

การตั้งครรภ์นั้นเป็นอย่างไร  ตั้งครรภ์จนคลอด  
 ทำแท้ง

กิจกรรม

หนูเล่นเกมสื่คอมพิวเตอร์หรือไม่?  ไม่  
 บางครั้ง  
 เป็นประจำ

หนูสูบบุหรี่หรือไม่?  ไม่  
 บางครั้ง  
 เป็นประจำ

หนูชอบการจีรตมอเตอรืไซค์เร็วๆ หรือไม่ ?  ไม่ชอบ  
 ชอบ  
 จีไม่เป็น

หนูเคยได้รับอุบัติเหตุในขณะที่จีรตมอเตอรืไซค์หรือไม่?  ไม่  
 ไซ้

หนูได้ใช้เวลาในการเซททางอินเทอร์เน็ตหรือไม่?  ไม่  
 บางครั้ง  
 บ่อยครั้ง

หนูฟังเพลงหรือไม่?  ไม่  
 บางครั้ง  
 บ่อยครั้ง

หนูอ่านหนังสือหรือไม่?  ไม่  
 บางครั้ง  
 บ่อยครั้ง

หนูดื่มเครื่องดื่มชูกำลัง เช่น กระทิงแดง ลิโพ หรือไม่?  ไม่  
 บางครั้ง  
 บ่อยครั้ง

หนูดื่มเบียร์หรือไม่?  ไม่  
 บางครั้ง  
 บ่อยครั้ง

หนูดื่มแอลกอฮอล์แรงๆ เช่น รีเจนซี่ , เหล้าขาว หรือไม่?  ไม่  
 บางครั้ง  
 บ่อยครั้ง

หนูเคยเมาไหม?  ไม่เลย  
 หนึ่งครั้ง  
 บางครั้ง  
 บ่อยครั้ง

หนูออกไปสังสรรค์กับเพื่อนของหนูหรือไม่?  ไม่  
 บางครั้ง  
 บ่อยครั้ง

หนูไปสังสรรค์ที่ไหน?  ที่บ้านตนเอง  
 ที่บ้านเพื่อน  
 ที่ห้างสรรพสินค้า  
 ในผับ/บาร์/ร้านอาหาร/ร้านเหล้าตอง  
 ที่สาธารณะ เช่น สวนสาธารณะ  
สถานที่ท่องเที่ยว สนามกีฬา  
 ที่อื่น ๆ: .....

หนูรู้จักคนที่ใช้ยาเสพติดหรือไม่?  ไม่รู้จัก  
 รู้จัก

หนูเล่นกีฬาหรือไม่?  ไม่  
 บางครั้ง  
 เป็นประจำ

หนูเล่นกีฬาอะไร? .....

หนูดูกีฬาทางทีวีหรือไม่?  ไม่  
 บางครั้ง  
 บ่อยครั้ง

กีฬาที่หนูชื่นชอบคืออะไร? .....

หนูมีโทรศัพท์มือถือมั๊ย?  มี  ไม่มี

- หนูดูละครทีวีหรือไม่?  ไม่  
 บางครั้ง  
 บ่อยครั้ง

หนูชอบดูละครเรื่องอะไร? .....

- หนูปลูกต้นไม้หรือไม่?  ไม่  
 บางครั้ง  
 บ่อยครั้ง

- หนูทำอาหารหรือไม่?  ไม่  
 บางครั้ง  
 บ่อยครั้ง

- หนูกำลังเรียนหรือเคยเรียนพิเศษหรือไม่?  ใช่  
 ไม่

- หนูนับถือศาสนาอะไร?  ไม่ได้นับถือศาสนาใด  
 พุทธ  
 คริสต์  
 อิสลาม  
 อื่น ๆ (ระบุ : .....)

- หนูไปวัด/โบสถ์/ สุเหร่า/ อื่น ๆ ครั้งสุดท้ายเมื่อไหร่?  สัปดาห์ที่แล้ว  
 เดือนที่แล้ว  
 3 เดือนที่แล้ว  
 ปีที่แล้ว  
 ช่วงเทศกาลเท่านั้น  
 ไม่ได้ไปเป็นเวลานาน

ขอบคุณมากสำหรับความร่วมมือ !
