# Supplementary material for: Factors influencing antiretroviral treatment suboptimal adherence among perinatally HIV-infected adolescents in Thailand
Source: PubMed Central journal article supplement (PMC5312953; doi:10.1371/journal.pone.0172392), 2017-02-16
Supplement: pone.0172392.s004.pdf [file pone.0172392.s004.pdf]

สถาบันการศึกษาประชากรแห่งชาติ ปารีส  
สถาบันวิจัยสังคม มหาวิทยาลัยเชียงใหม่ จังหวัดเชียงใหม่

แบบสอบถามสำหรับพ่อแม่/ผู้ดูแล  
เมษายน 2553

รหัสประจำตัวผู้ให้สัมภาษณ์ :

หมายเลขประจำตัวเด็ก: .....

เด็ก

เพศของเด็กในความดูแล:  1 ชาย  2 หญิง

วันที่สัมภาษณ์: |\_\_|\_\_| วัน |\_\_|\_\_| เดือน |\_2\_|\_5\_|\_5\_|\_\_| ปี

เวลาเริ่มสัมภาษณ์: |\_\_|\_\_| นาฬิกา |\_\_|\_\_| นาที

กรุณาแนะนำโครงการวิจัยและขอการแสดงความคิดเห็น

ชื่อผู้สัมภาษณ์: .....

รหัส: |\_\_|\_\_|

สถานที่ที่เข้าร่วมการวิจัย: ..... รหัส: |\_\_|\_\_|

## หมวด R: ผู้ตอบแบบสอบถาม

|                                                         |                                                                                  |                                                                                                                                                                                                                                                                                                           |        |
|---------------------------------------------------------|----------------------------------------------------------------------------------|-----------------------------------------------------------------------------------------------------------------------------------------------------------------------------------------------------------------------------------------------------------------------------------------------------------|--------|
| เราต้องการทราบเกี่ยวกับท่านในฐานะที่ท่านเป็นผู้ดูแลเด็ก |                                                                                  |                                                                                                                                                                                                                                                                                                           |        |
| R.0                                                     | เพศ                                                                              | <input type="checkbox"/> 1 ชาย<br><input type="checkbox"/> 2 หญิง                                                                                                                                                                                                                                         |        |
| R.00                                                    | อายุของผู้ตอบแบบสอบถาม                                                           | __ __ ปี                                                                                                                                                                                                                                                                                                  |        |
| R.1                                                     | ท่านมีความสัมพันธ์กับเด็กอย่างไร                                                 | .....                                                                                                                                                                                                                                                                                                     | __ __  |
| R.2                                                     | สถานภาพสมรสของท่านคือ                                                            | <input type="checkbox"/> 1 โสด<br><input type="checkbox"/> 2 สมรส<br><input type="checkbox"/> 3 หย่า/ แยกกันอยู่<br><input type="checkbox"/> 4 หม้าย                                                                                                                                                      |        |
| G.1                                                     | สัญชาติของท่านคือ?                                                               | <input type="checkbox"/> 1 สัญชาติไทย<br><input type="checkbox"/> 2 ไม่ใช่สัญชาติไทย ระบุ.....                                                                                                                                                                                                            |        |
| G.2                                                     | เชื้อชาติของท่านคือ?                                                             | <input type="checkbox"/> 1 เชื้อชาติไทย<br><input type="checkbox"/> 2 ไม่ใช่เชื้อชาติไทย ระบุ.....                                                                                                                                                                                                        |        |
| R.3                                                     | ท่านเคยเข้าโรงเรียนหรือไม่                                                       | <input type="checkbox"/> 1 ใช่<br><input type="checkbox"/> 2 ไม่ใช่                                                                                                                                                                                                                                       | ⇒Q R.5 |
| R.4                                                     | ท่านสำเร็จการศึกษาในระดับใด                                                      | ระดับการศึกษาสูงสุด:  __ __ <br><input type="checkbox"/> 1 ประถมศึกษา<br><input type="checkbox"/> 2 มัธยมศึกษาตอนต้น<br><input type="checkbox"/> 3 วิทยาลัยครู<br><input type="checkbox"/> 4 วิทยาลัยอาชีวศึกษา<br><input type="checkbox"/> 5 มหาวิทยาลัย<br><input type="checkbox"/> 6 อื่นๆ (ระบุ)..... |        |
| R.5                                                     | ปัจจุบันท่านประกอบอาชีพอะไร                                                      | .....                                                                                                                                                                                                                                                                                                     | __ __  |
| R.6                                                     | ท่านจัดลำดับคะแนนด้านสุขภาพของท่านอยู่ในระดับไหน<br>ใช้ "SMILE" SCALE            | <input type="checkbox"/> 1 แย่มาก<br><input type="checkbox"/> 2 แย่<br><input type="checkbox"/> 3 พอใช้<br><input type="checkbox"/> 4 ดี<br><input type="checkbox"/> 5 ดีมาก                                                                                                                              | __ __  |
| R.7                                                     | ท่านป่วยเป็นโรคเรื้อรังใด(รวมถึงการติดเชื้อเอช ไอ วี)<br>หรือทุพพลภาพถาวรหรือไม่ | <input type="checkbox"/> 1 ไม่<br><input type="checkbox"/> 2 ใช่ ระบุ .....                                                                                                                                                                                                                               |        |

### หมวด A : คำถามเกี่ยวกับชีวิตของเด็ก

| ลำดับ         | คำถามหลักและคำถามสนับสนุน                                                            | ประเภทของการกรอกรหัส                                                                                                     | ไปยัง                   |
|---------------|--------------------------------------------------------------------------------------|--------------------------------------------------------------------------------------------------------------------------|-------------------------|
| <b>เด็ก :</b> |                                                                                      |                                                                                                                          |                         |
|               | ลำดับแรก เราจะขอถามท่านเป็นคำถามเกี่ยวกับเด็กที่ท่านดูแล                             |                                                                                                                          |                         |
| <b>A.1.</b>   | อายุ (column 2)<br>เด็กอายุเท่าไร?<br>วงกลมรอบอายุของเด็ก                            | _ _ _  ปี จนถึงวันนี้                                                                                                    | <b>Column 2</b><br>อายุ |
| <b>A.2</b>    | ปี (Column 1)<br>เด็กเกิดวันที่เท่าไร (ปีที่เด็กเกิด)?                               | _ _ _   _ _ _    2_  5_ _ _ _ <br>วัน                      เดือน                      ปี                                 | <b>Column 1</b><br>ปี   |
|               | 1. กรอกปีที่เกิด และทุกๆปีต่อมาจนกระทั่งถึงปีปัจจุบัน<br>2. จี๊ดเส้นสำหรับปีปัจจุบัน |                                                                                                                          |                         |
| <b>G. 3</b>   | สัญชาติของเด็กคือ?                                                                   | <input type="checkbox"/> <sub>1</sub> สัญชาติไทย<br><input type="checkbox"/> <sub>2</sub> ไม่ใช่สัญชาติไทย ระบุ.....     |                         |
| <b>G. 4</b>   | เชื้อชาติของเด็กคือ?                                                                 | <input type="checkbox"/> <sub>1</sub> เชื้อชาติไทย<br><input type="checkbox"/> <sub>2</sub> ไม่ใช่เชื้อชาติไทย ระบุ..... | _ _ _                   |

| สถานภาพของบิดามารดาผู้ให้กำเนิดเด็ก       |                                                                                                                                                 |                                                                                                                                                                                                                                                                                                                                                                                          |                 |
|-------------------------------------------|-------------------------------------------------------------------------------------------------------------------------------------------------|------------------------------------------------------------------------------------------------------------------------------------------------------------------------------------------------------------------------------------------------------------------------------------------------------------------------------------------------------------------------------------------|-----------------|
| มารดา                                     |                                                                                                                                                 |                                                                                                                                                                                                                                                                                                                                                                                          |                 |
| B.3                                       | <b>ถ้าผู้ตอบแบบสอบถามไม่ใช่มารดาของเด็ก<br/>ให้ถามคำถามดังต่อไปนี้</b><br><br>มารดาของเด็กยังมีชีวิตอยู่หรือไม่:                                | <input type="checkbox"/> <sub>1</sub> ใช่<br><input type="checkbox"/> <sub>2</sub> อาศัยอยู่ในครอบครัว → <b>B.6</b><br><input type="checkbox"/> <sub>3</sub> ไม่ได้อาศัยอยู่ในครอบครัว → <b>B.6</b><br>ท่านต้องกรอกแบบสอบถามในหัวข้อ <b>BB</b> ในหน้าถัดไป<br><input type="checkbox"/> <sub>4</sub> ไม่ <span style="float: right;"><input type="checkbox"/><sub>98</sub> ไม่ทราบ</span> |                 |
| B.4                                       | กรอกวันเดือนปีในคอลัมน์สถานภาพของมารดา (COLUMN 3) และอายุของเด็กขณะที่มารดาของเด็กเสียชีวิต                                                     |                                                                                                                                                                                                                                                                                                                                                                                          | <b>Column 3</b> |
| B.5                                       | กรณีที่มีมารดาของเด็กเสียชีวิต การเสียชีวิตนั้นเกี่ยวข้องกับ<br>เอช ไอ วี / เอดส์ หรือไม่                                                       | <input type="checkbox"/> <sub>1</sub> ใช่ ระบุ:.....<br><input type="checkbox"/> <sub>2</sub> ไม่ใช่ ระบุ:.....<br><span style="float: right;"><input type="checkbox"/> 98 ไม่ทราบ</span>                                                                                                                                                                                                |                 |
| บิดา                                      |                                                                                                                                                 |                                                                                                                                                                                                                                                                                                                                                                                          |                 |
| B.6                                       | <b>ถ้าผู้ตอบแบบสอบถามไม่ใช่บิดาของเด็ก<br/>ให้ถามคำถามดังต่อไปนี้</b><br><br>บิดาของเด็กยังมีชีวิตอยู่หรือไม่:                                  | <input type="checkbox"/> <sub>1</sub> ใช่<br><input type="checkbox"/> <sub>2</sub> อาศัยอยู่ในครอบครัว → <b>B.9</b><br><input type="checkbox"/> <sub>3</sub> ไม่ได้อาศัยอยู่ในครอบครัว → <b>B.9</b><br>ท่านต้องกรอกแบบสอบถามในหัวข้อ <b>BB</b> ในหน้าถัดไป<br><input type="checkbox"/> <sub>4</sub> ไม่ <span style="float: right;"><input type="checkbox"/><sub>98</sub> ไม่ทราบ</span> |                 |
| B.7                                       | กรอกวันเดือนปีในคอลัมน์สถานภาพของบิดา (COLUMN 3) และอายุของเด็กขณะที่บิดาของเด็กเสียชีวิต                                                       |                                                                                                                                                                                                                                                                                                                                                                                          | <b>Column3</b>  |
| B.8a                                      | กรณีที่บิดาของเด็กเสียชีวิต การเสียชีวิตนั้นเกี่ยวข้องกับ<br>เอช ไอ วี / เอดส์ หรือไม่                                                          | <input type="checkbox"/> <sub>1</sub> ใช่ ระบุ:.....<br><input type="checkbox"/> <sub>2</sub> ไม่ใช่ ระบุ:.....<br><span style="float: right;"><input type="checkbox"/><sub>98</sub> ไม่ทราบ</span>                                                                                                                                                                                      |                 |
| B.8b                                      | ถ้าพ่อแม่ของเด็กหย่าร้าง ให้เขียนลงใน MF-SEP ปีที่หย่าร้าง                                                                                      |                                                                                                                                                                                                                                                                                                                                                                                          | <b>Column3</b>  |
| M F-SEP  __ __  ปี หรืออายุของเด็ก  __ __ |                                                                                                                                                 |                                                                                                                                                                                                                                                                                                                                                                                          |                 |
| พี่น้องของเด็ก (พ่อแม่เดียวกันเท่านั้น)   |                                                                                                                                                 |                                                                                                                                                                                                                                                                                                                                                                                          |                 |
| B.9                                       | เด็กมีพี่น้องกี่คน รวมทั้งพี่น้องที่เสียชีวิตไปแล้ว<br>กรณีที่มีการกล่าวถึงพี่น้องคนอื่นๆ<br>(ที่มีได้ถือกำเนิดจากบิดามารดาเดียวกัน) ระบุ:..... | __ __  รวมทั้งตัวเด็กด้วย                                                                                                                                                                                                                                                                                                                                                                |                 |
| B.10                                      | พี่น้องที่ยังมีชีวิตอยู่ มีกี่คน                                                                                                                | __ __  <span style="float: right;"><input type="checkbox"/><sub>98</sub> ไม่ทราบ</span>                                                                                                                                                                                                                                                                                                  |                 |
| B.11                                      | มีพี่น้องกี่คนที่ติดเชื้อเอช ไอ วี                                                                                                              | __ __  <span style="float: right;"><input type="checkbox"/><sub>98</sub></span><br>ไม่ทราบ                                                                                                                                                                                                                                                                                               |                 |
| B.12                                      | มีพี่น้องกี่คนที่เสียชีวิตเนื่องจากเอช ไอ วี /                                                                                                  | __ __  <span style="float: right;"><input type="checkbox"/><sub>98</sub> ไม่ทราบ</span>                                                                                                                                                                                                                                                                                                  |                 |

ผู้ดูแลเด็ก

|                                                |                                                                                                                                        |                     |
|------------------------------------------------|----------------------------------------------------------------------------------------------------------------------------------------|---------------------|
| B.13                                           | ตารางเหตุการณ์ในชีวิต: ผู้ดูแลเด็ก (Column 4)<br>ระบุความสัมพันธ์ของผู้ดูแลกับเด็กตั้งแต่แรกคลอด (ความสัมพันธ์ในฐานะผู้ดูแลที่แท้จริง) | Column 4<br>ผู้ดูแล |
| ต่อไปนี้จะขอถามเกี่ยวกับผู้ที่ร่วมอาศัยกับเด็ก |                                                                                                                                        |                     |

เราต้องการทราบเกี่ยวกับผู้ที่ร่วมอาศัยกับเด็ก

|     | แบบสอบถามด้านครัวเรือน                                                                                                                                                    | ผู้ร่วมอาศัย | แบบสอบถามด้านครัวเรือน |
|-----|---------------------------------------------------------------------------------------------------------------------------------------------------------------------------|--------------|------------------------|
| H.1 | 1. กรอกข้อมูลในส่วน H ของแบบสอบถามด้านครัวเรือน:<br>2. ให้ข้อมูลของผู้ร่วมอาศัยเป็นรายบุคคล กรอกอายุของแต่ละคน ความสัมพันธ์ของผู้ที่ร่วมอาศัยกับเด็ก อาชีพของผู้ร่วมอาศัย |              |                        |

หัวข้อ **BB** คำถามในส่วนนี้สำหรับกรณีที่มารดายังมีชีวิตอยู่แต่ไม่ได้อาศัยอยู่กับครอบครัวหรือบิดายังมีชีวิตอยู่แต่ไม่ได้อาศัยอยู่กับครอบครัวเท่านั้น

|      | สถานภาพของบิดา<br>↓                                                                                                                                                                                                                                                                                                                                              | สถานภาพของมารดา<br>↓                                                                                                                                                                                                                                                                                                                                              |
|------|------------------------------------------------------------------------------------------------------------------------------------------------------------------------------------------------------------------------------------------------------------------------------------------------------------------------------------------------------------------|-------------------------------------------------------------------------------------------------------------------------------------------------------------------------------------------------------------------------------------------------------------------------------------------------------------------------------------------------------------------|
| BB.1 | บิดาของเด็กติดเชื้อมะเร็ง เอช ไอ วีหรือไม่<br><input type="checkbox"/> 1 ใช่<br><input type="checkbox"/> 2 ไม่<br><input type="checkbox"/> 98 ไม่ทราบ                                                                                                                                                                                                            | มารดาของเด็กติดเชื้อมะเร็ง เอช ไอ วีหรือไม่<br><input type="checkbox"/> 1 ใช่<br><input type="checkbox"/> 2 ไม่<br><input type="checkbox"/> 98 ไม่ทราบ                                                                                                                                                                                                            |
| BB.2 | บิดาของเด็กอาศัยอยู่ที่ไหน.....                                                                                                                                                                                                                                                                                                                                  | มารดาของเด็กอาศัยอยู่ที่ไหน.....                                                                                                                                                                                                                                                                                                                                  |
| BB.3 | บิดาของเด็กประกอบอาชีพอะไร.....                                                                                                                                                                                                                                                                                                                                  | มารดาของเด็กประกอบอาชีพอะไร.....                                                                                                                                                                                                                                                                                                                                  |
| BB.4 | บิดาของเด็กได้ส่งเงินมาให้เพื่อใช้เลี้ยงดูเด็กหรือไม่<br><input type="checkbox"/> 1 ใช่<br><input type="checkbox"/> 2 ไม่                                                                                                                                                                                                                                        | มารดาของเด็กได้ส่งเงินมาให้เพื่อใช้เลี้ยงดูเด็กหรือไม่<br><input type="checkbox"/> 1 ใช่<br><input type="checkbox"/> 2 ไม่                                                                                                                                                                                                                                        |
| BB.5 | สถานการณ์ของครอบครัวบิดาเป็นอย่างไร<br><input type="checkbox"/> 1 ยังคงสถานภาพสมรส<br><input type="checkbox"/> 2 หย่าร้าง<br><input type="checkbox"/> 3 แต่งงานใหม่<br><input type="checkbox"/> 4 แต่งงานใหม่และมีลูกติดจากภรรยาใหม่<br><input type="checkbox"/> 5 อื่นๆ.....<br><input type="checkbox"/> 98 ไม่ทราบ                                             | สถานการณ์ของครอบครัวมารดาเป็นอย่างไร<br><input type="checkbox"/> 1 ยังคงสถานภาพสมรส<br><input type="checkbox"/> 2 หย่าร้าง<br><input type="checkbox"/> 3 แต่งงานใหม่<br><input type="checkbox"/> 4 แต่งงานใหม่และมีลูกติดจากสามีใหม่<br><input type="checkbox"/> 5 อื่นๆ.....<br><input type="checkbox"/> 98 ไม่ทราบ                                              |
| BB.6 | เด็กได้พบกับบิดาบ่อยแค่ไหนในปีที่ผ่านมา<br><input type="checkbox"/> 1 มากกว่า 1 ครั้งต่อสัปดาห์<br><input type="checkbox"/> 2 เดือนละ 2 - 3 ครั้ง<br><input type="checkbox"/> 3 ปีละ 2 - 3 ครั้ง<br><input type="checkbox"/> 4 ปีละครั้ง<br><input type="checkbox"/> 5 ไม่เคยพบ<br><input type="checkbox"/> 6 อื่นๆ (ระบุ):<br>(ตอบข้อเดียวที่เป็นไปได้เท่านั้น) | เด็กได้พบกับมารดาบ่อยแค่ไหนในปีที่ผ่านมา<br><input type="checkbox"/> 1 มากกว่า 1 ครั้งต่อสัปดาห์<br><input type="checkbox"/> 2 เดือนละ 2 - 3 ครั้ง<br><input type="checkbox"/> 3 ปีละ 2 - 3 ครั้ง<br><input type="checkbox"/> 4 ปีละครั้ง<br><input type="checkbox"/> 5 ไม่เคยพบ<br><input type="checkbox"/> 6 อื่นๆ (ระบุ):<br>(ตอบข้อเดียวที่เป็นไปได้เท่านั้น) |

## ที่อยู่อาศัยของเด็ก

|                                                                                       |                                                                                                                                                                                                                                                                        |                                 |
|---------------------------------------------------------------------------------------|------------------------------------------------------------------------------------------------------------------------------------------------------------------------------------------------------------------------------------------------------------------------|---------------------------------|
| ต่อไปนี้จะสอบถามคุณเกี่ยวกับสถานที่ที่เด็กอยู่อาศัยมานานกว่า 1 ปีตลอดช่วงชีวิตของเด็ก |                                                                                                                                                                                                                                                                        |                                 |
| <b>A.3</b>                                                                            | <p><b>ที่อยู่อาศัย (Column 5)</b><br/>         พักอยู่ที่ไหน (ตัวเมือง/หมู่บ้าน) ที่เด็กพักอาศัยอยู่ตั้งแต่เกิดและเริ่มพักอาศัยเมื่อใด<br/>         กรอกชื่อที่พักทั้งหมดที่เด็กเคยพักอาศัยอยู่ (ตัวเมือง/หมู่บ้าน) เป็นเวลาอย่างน้อย 1 ปีตั้งแต่เกิดจนถึงปัจจุบัน</p> | <b>Column 5</b><br>ที่อยู่อาศัย |

## การไปโรงเรียนและการทำงานของเด็ก

|                                   |                                                                                                                                                                                                                                                                                                                          |                                          |
|-----------------------------------|--------------------------------------------------------------------------------------------------------------------------------------------------------------------------------------------------------------------------------------------------------------------------------------------------------------------------|------------------------------------------|
| <b>A.4</b>                        | <p><b>การเข้าชั้นเรียน / การทำงาน (Column 6)</b><br/>         กรอกปีที่เด็กเริ่มเข้าเรียนและเรียนจบ เว้นระยะบรรทัด ในช่วงที่เด็กหยุดเรียนมากกว่า 6 เดือน (อธิบายว่าเพราะเหตุใด)<br/>         กรอกแบบสอบถามในข้อ QA5 และ QA6<br/>         ถ้าเด็กไม่ได้ไปโรงเรียนและกำลังทำงานอยู่ให้กรอกงานที่เด็กทำในลักษณะเดียวกัน</p> | <b>Column 6</b><br>โรงเรียน/<br>ที่ทำงาน |
| <b>A.5</b>                        | <p>เด็กเข้าเรียน/เคยเรียนในโรงเรียนประเภทไหน</p> <p><input type="checkbox"/> 1 โรงเรียนรัฐบาล<br/> <input type="checkbox"/> 2 โรงเรียนเอกชน<br/> <input type="checkbox"/> 3 โรงเรียนวัด<br/> <input type="checkbox"/> 4 อื่นๆ ระบุ:.....</p>                                                                             |                                          |
| <b>A.6</b>                        | <p>เด็กเคยเรียนซ้ำชั้นหรือไม่</p> <p><input type="checkbox"/> 1 ไม่<br/> <input type="checkbox"/> 2 ใช่ ระบุระยะเวลา (กี่ปี):<br/>         .....</p>                                                                                                                                                                     |                                          |
| <b>เด็กกำลังทำงานอยู่หรือไม่?</b> |                                                                                                                                                                                                                                                                                                                          |                                          |
| <b>A.7.</b>                       | <p>เด็กประกอบอาชีพอะไร?</p> <p>.....</p>                                                                                                                                                                                                                                                                                 |                                          |
| <b>A.8</b>                        | <p>ท่านสามารถบอกรายได้โดยประมาณของเด็กได้หรือไม่?</p> <p> _ _ , _ _  บาท<br/> <input type="checkbox"/> 1 ต่อเดือน (เดือนที่ผ่านมา)<br/> <input type="checkbox"/> 2 ต่อวัน<br/>         ถ้ามีรายได้ต่อวัน<br/>         ระบุว่าทำงานกี่วันในเดือนในเดือนที่ผ่านมา:  _ _ </p>                                               |                                          |
| <b>A.9</b>                        | <p>เด็กแบ่งเงินรายได้ให้ครอบครัวหรือไม่?</p> <p><input type="checkbox"/> 1 ไม่<br/> <input type="checkbox"/> 2 ใช่</p>                                                                                                                                                                                                   |                                          |

**หมวด C: สุขภาพของเด็ก**

ต่อไปนี้จะขอลาม 2 – 3 คำถามเกี่ยวกับประวัติการติดเชื้อเอช ไอ วีของเด็ก

|                   |                                                                                                                                                                                                                                                                                                    |                                                                                                                                                                                                                                                                                                                                                                                                                                                                                                                                                                                                                                                                      |                                |
|-------------------|----------------------------------------------------------------------------------------------------------------------------------------------------------------------------------------------------------------------------------------------------------------------------------------------------|----------------------------------------------------------------------------------------------------------------------------------------------------------------------------------------------------------------------------------------------------------------------------------------------------------------------------------------------------------------------------------------------------------------------------------------------------------------------------------------------------------------------------------------------------------------------------------------------------------------------------------------------------------------------|--------------------------------|
| <p><b>C.1</b></p> | <p>ตารางเหตุการณ์ในชีวิต: โรค (<b>Column 7</b>)<br/>ท่านช่วยบอกว่าเด็กได้รับการวินิจฉัยว่าติดเชื้อเอช ไอ วี<br/>เมื่ออายุเท่าไร<br/>กรอกอายุเด็กในคอลัมน์ 7 : โรค</p>                                                                                                                              | <p> __ __ ปี หรือ  __ __  เดือน<br/><br/><input type="checkbox"/> 98 ไม่ทราบ</p> <p style="text-align: right;"><b>TEST</b></p>                                                                                                                                                                                                                                                                                                                                                                                                                                                                                                                                       | <p><b>Column 7</b><br/>โรค</p> |
| <p>C.2</p>        | <p>เหตุผลที่เด็กได้รับการวินิจฉัยคืออะไร<br/><br/>ข้อคิดเห็นที่ตอบตามธรรมชาติ:<br/>.....<br/>.....<br/>.....<br/>.....<br/><br/>อธิบายตามธรรมชาติว่าเด็กติดเชื้อได้อย่างไร :<br/><br/><input type="checkbox"/> การถ่ายทอดเชื้อจากแม่สู่ลูก<br/><br/><input type="checkbox"/> อื่นๆ ระบุ: .....</p> | <p><input type="checkbox"/> 1 เนื่องจากเกิดอาการแสดงของการติดเชื้อ เอช ไอ วี<br/>(ระบุ):.....<br/><input type="checkbox"/> 2 ที่โรงพยาบาลเนื่องจากเหตุผลอื่นๆ (ระบุ): .....</p> <p><input type="checkbox"/> 3 เนื่องจากบิดา/มารดาของเด็กติดเชื้อเอช ไอ วีขณะตั้งครรภ์<br/>และเด็กได้รับการตรวจเพื่อหาการติดเชื้อหลังคลอด</p> <p><input type="checkbox"/> 4 เนื่องจากบิดามารดาของเด็กป่วย</p> <p><input type="checkbox"/> 5 เนื่องจากบิดามารดาของเด็กเสียชีวิตเนื่องจากโรคเอดส์</p> <p><input type="checkbox"/> 6 เนื่องจากพี่น้องเจ็บป่วยหรือเสียชีวิต</p> <p><input type="checkbox"/> 7 อื่นๆ (ระบุ):.....<br/>.....</p> <p><input type="checkbox"/> 98 ไม่ทราบ</p> |                                |

**อาการแสดงของเอช ไอ วี**

|                         |                                                                                                                                                                                                      |                                                                                                                                                                                                                                                                                                                                                                                                                                                                                                                                                                                                                                                                                                                                                                                                                                                                                                                                                                                                                                                                                                                                                                                                                                                                                                                                                                                                                                                                                                                              |                                |     |     |        |                                |                          |           |                                |                          |                         |                                |                          |        |                                |                          |                 |                                |                          |                      |                                |                          |                        |                                |                          |                  |                                |                          |  |
|-------------------------|------------------------------------------------------------------------------------------------------------------------------------------------------------------------------------------------------|------------------------------------------------------------------------------------------------------------------------------------------------------------------------------------------------------------------------------------------------------------------------------------------------------------------------------------------------------------------------------------------------------------------------------------------------------------------------------------------------------------------------------------------------------------------------------------------------------------------------------------------------------------------------------------------------------------------------------------------------------------------------------------------------------------------------------------------------------------------------------------------------------------------------------------------------------------------------------------------------------------------------------------------------------------------------------------------------------------------------------------------------------------------------------------------------------------------------------------------------------------------------------------------------------------------------------------------------------------------------------------------------------------------------------------------------------------------------------------------------------------------------------|--------------------------------|-----|-----|--------|--------------------------------|--------------------------|-----------|--------------------------------|--------------------------|-------------------------|--------------------------------|--------------------------|--------|--------------------------------|--------------------------|-----------------|--------------------------------|--------------------------|----------------------|--------------------------------|--------------------------|------------------------|--------------------------------|--------------------------|------------------|--------------------------------|--------------------------|--|
| <p><b>C.3</b></p>       | <p>ตารางเหตุการณ์ในชีวิต:โรค (<b>Column 7</b>)<br/>ท่านช่วยบอกว่าเด็กมีอาการ/อาการแสดงต่างๆอันเนื่องมาจากกา<br/>รติดเชื้อเอช ไอ วี / เอดส์เมื่อไร<br/>กรอกอายุเด็กในคอลัมน์ 7 : โรค <b>SYMPT</b></p> | <p><input type="checkbox"/> , ไม่เคย → <b>C.5</b><br/><br/> __ __ ปี หรือ  __ __  เดือน<br/><br/><input type="checkbox"/> ไม่ทราบ</p>                                                                                                                                                                                                                                                                                                                                                                                                                                                                                                                                                                                                                                                                                                                                                                                                                                                                                                                                                                                                                                                                                                                                                                                                                                                                                                                                                                                        | <p><b>Column 7</b><br/>โรค</p> |     |     |        |                                |                          |           |                                |                          |                         |                                |                          |        |                                |                          |                 |                                |                          |                      |                                |                          |                        |                                |                          |                  |                                |                          |  |
| <p>C.4</p>              | <p>ถ้าเคย เด็กต้องทนทุกข์ทรมานกับโรคต่อไปนี้หรือไม่<br/><br/>ตอบได้มากกว่า 1 ข้อ<br/>ข้อเสนอแนะ:.....<br/>.....<br/>.....</p>                                                                        | <table border="1" style="width: 100%;"> <tr> <td></td> <td style="text-align: center;">ใช่</td> <td style="text-align: center;">ไม่</td> </tr> <tr> <td>วันโรค</td> <td style="text-align: center;">.....<input type="checkbox"/></td> <td style="text-align: center;"><input type="checkbox"/></td> </tr> <tr> <td>ปอดอักเสบ</td> <td style="text-align: center;">.....<input type="checkbox"/></td> <td style="text-align: center;"><input type="checkbox"/></td> </tr> <tr> <td>เชื้อราที่เชื้อหุ้มสมอง</td> <td style="text-align: center;">.....<input type="checkbox"/></td> <td style="text-align: center;"><input type="checkbox"/></td> </tr> <tr> <td>คางทูม</td> <td style="text-align: center;">.....<input type="checkbox"/></td> <td style="text-align: center;"><input type="checkbox"/></td> </tr> <tr> <td>ปัญหาโรคผิวหนัง</td> <td style="text-align: center;">.....<input type="checkbox"/></td> <td style="text-align: center;"><input type="checkbox"/></td> </tr> <tr> <td>การเจริญเติบโตล่าช้า</td> <td style="text-align: center;">.....<input type="checkbox"/></td> <td style="text-align: center;"><input type="checkbox"/></td> </tr> <tr> <td>ความบกพร่องทางสติปัญญา</td> <td style="text-align: center;">.....<input type="checkbox"/></td> <td style="text-align: center;"><input type="checkbox"/></td> </tr> <tr> <td>อื่นๆ ระบุ:.....</td> <td style="text-align: center;">.....<input type="checkbox"/></td> <td style="text-align: center;"><input type="checkbox"/></td> </tr> </table> |                                | ใช่ | ไม่ | วันโรค | ..... <input type="checkbox"/> | <input type="checkbox"/> | ปอดอักเสบ | ..... <input type="checkbox"/> | <input type="checkbox"/> | เชื้อราที่เชื้อหุ้มสมอง | ..... <input type="checkbox"/> | <input type="checkbox"/> | คางทูม | ..... <input type="checkbox"/> | <input type="checkbox"/> | ปัญหาโรคผิวหนัง | ..... <input type="checkbox"/> | <input type="checkbox"/> | การเจริญเติบโตล่าช้า | ..... <input type="checkbox"/> | <input type="checkbox"/> | ความบกพร่องทางสติปัญญา | ..... <input type="checkbox"/> | <input type="checkbox"/> | อื่นๆ ระบุ:..... | ..... <input type="checkbox"/> | <input type="checkbox"/> |  |
|                         | ใช่                                                                                                                                                                                                  | ไม่                                                                                                                                                                                                                                                                                                                                                                                                                                                                                                                                                                                                                                                                                                                                                                                                                                                                                                                                                                                                                                                                                                                                                                                                                                                                                                                                                                                                                                                                                                                          |                                |     |     |        |                                |                          |           |                                |                          |                         |                                |                          |        |                                |                          |                 |                                |                          |                      |                                |                          |                        |                                |                          |                  |                                |                          |  |
| วันโรค                  | ..... <input type="checkbox"/>                                                                                                                                                                       | <input type="checkbox"/>                                                                                                                                                                                                                                                                                                                                                                                                                                                                                                                                                                                                                                                                                                                                                                                                                                                                                                                                                                                                                                                                                                                                                                                                                                                                                                                                                                                                                                                                                                     |                                |     |     |        |                                |                          |           |                                |                          |                         |                                |                          |        |                                |                          |                 |                                |                          |                      |                                |                          |                        |                                |                          |                  |                                |                          |  |
| ปอดอักเสบ               | ..... <input type="checkbox"/>                                                                                                                                                                       | <input type="checkbox"/>                                                                                                                                                                                                                                                                                                                                                                                                                                                                                                                                                                                                                                                                                                                                                                                                                                                                                                                                                                                                                                                                                                                                                                                                                                                                                                                                                                                                                                                                                                     |                                |     |     |        |                                |                          |           |                                |                          |                         |                                |                          |        |                                |                          |                 |                                |                          |                      |                                |                          |                        |                                |                          |                  |                                |                          |  |
| เชื้อราที่เชื้อหุ้มสมอง | ..... <input type="checkbox"/>                                                                                                                                                                       | <input type="checkbox"/>                                                                                                                                                                                                                                                                                                                                                                                                                                                                                                                                                                                                                                                                                                                                                                                                                                                                                                                                                                                                                                                                                                                                                                                                                                                                                                                                                                                                                                                                                                     |                                |     |     |        |                                |                          |           |                                |                          |                         |                                |                          |        |                                |                          |                 |                                |                          |                      |                                |                          |                        |                                |                          |                  |                                |                          |  |
| คางทูม                  | ..... <input type="checkbox"/>                                                                                                                                                                       | <input type="checkbox"/>                                                                                                                                                                                                                                                                                                                                                                                                                                                                                                                                                                                                                                                                                                                                                                                                                                                                                                                                                                                                                                                                                                                                                                                                                                                                                                                                                                                                                                                                                                     |                                |     |     |        |                                |                          |           |                                |                          |                         |                                |                          |        |                                |                          |                 |                                |                          |                      |                                |                          |                        |                                |                          |                  |                                |                          |  |
| ปัญหาโรคผิวหนัง         | ..... <input type="checkbox"/>                                                                                                                                                                       | <input type="checkbox"/>                                                                                                                                                                                                                                                                                                                                                                                                                                                                                                                                                                                                                                                                                                                                                                                                                                                                                                                                                                                                                                                                                                                                                                                                                                                                                                                                                                                                                                                                                                     |                                |     |     |        |                                |                          |           |                                |                          |                         |                                |                          |        |                                |                          |                 |                                |                          |                      |                                |                          |                        |                                |                          |                  |                                |                          |  |
| การเจริญเติบโตล่าช้า    | ..... <input type="checkbox"/>                                                                                                                                                                       | <input type="checkbox"/>                                                                                                                                                                                                                                                                                                                                                                                                                                                                                                                                                                                                                                                                                                                                                                                                                                                                                                                                                                                                                                                                                                                                                                                                                                                                                                                                                                                                                                                                                                     |                                |     |     |        |                                |                          |           |                                |                          |                         |                                |                          |        |                                |                          |                 |                                |                          |                      |                                |                          |                        |                                |                          |                  |                                |                          |  |
| ความบกพร่องทางสติปัญญา  | ..... <input type="checkbox"/>                                                                                                                                                                       | <input type="checkbox"/>                                                                                                                                                                                                                                                                                                                                                                                                                                                                                                                                                                                                                                                                                                                                                                                                                                                                                                                                                                                                                                                                                                                                                                                                                                                                                                                                                                                                                                                                                                     |                                |     |     |        |                                |                          |           |                                |                          |                         |                                |                          |        |                                |                          |                 |                                |                          |                      |                                |                          |                        |                                |                          |                  |                                |                          |  |
| อื่นๆ ระบุ:.....        | ..... <input type="checkbox"/>                                                                                                                                                                       | <input type="checkbox"/>                                                                                                                                                                                                                                                                                                                                                                                                                                                                                                                                                                                                                                                                                                                                                                                                                                                                                                                                                                                                                                                                                                                                                                                                                                                                                                                                                                                                                                                                                                     |                                |     |     |        |                                |                          |           |                                |                          |                         |                                |                          |        |                                |                          |                 |                                |                          |                      |                                |                          |                        |                                |                          |                  |                                |                          |  |
| <p>C.5</p>              | <p>ปัจจุบันนี้เด็กมีอาการแสดงต่างๆของโรคหรือมีปัญหาด้านสุขภาพหรือไม่</p>                                                                                                                             | <p><input type="checkbox"/> 1 ไม่<br/><input type="checkbox"/> 2 ใช่ (ระบุ):.....</p>                                                                                                                                                                                                                                                                                                                                                                                                                                                                                                                                                                                                                                                                                                                                                                                                                                                                                                                                                                                                                                                                                                                                                                                                                                                                                                                                                                                                                                        |                                |     |     |        |                                |                          |           |                                |                          |                         |                                |                          |        |                                |                          |                 |                                |                          |                      |                                |                          |                        |                                |                          |                  |                                |                          |  |

## การรักษาด้วยยาต้านไวรัส

|      |                                                                                                                                                                                                                                                                     |                                                                                                                                                                                                                                                                                                                                                                                                                    |                                                |
|------|---------------------------------------------------------------------------------------------------------------------------------------------------------------------------------------------------------------------------------------------------------------------|--------------------------------------------------------------------------------------------------------------------------------------------------------------------------------------------------------------------------------------------------------------------------------------------------------------------------------------------------------------------------------------------------------------------|------------------------------------------------|
| C.6  | <p>ตารางเหตุการณ์ในชีวิต: โรค (Column 7)</p> <p>ท่านช่วยบอกว่าเด็กได้รับการรักษาด้วยยาต้านไวรัสครั้งแรกเมื่อไหร่</p> <p>กรอกอายุเด็กในคอลัมน์ 7 : โรค <b>ARV</b></p>                                                                                                | <p> __ __ ปี</p> <p><input type="checkbox"/><sub>99</sub> ไม่ทราบ</p> <p>ถ้าเด็กยังไม่ได้เริ่มรับการรักษาด้วยยาต้านไวรัส<br/>ข้ามไปข้อ C.14</p>                                                                                                                                                                                                                                                                    | <p><b>Column 7</b></p> <p>โรค</p>              |
| C.7  | <p>ท่านคิดว่าเป็นเรื่องง่ายหรือยากสำหรับเด็กในการจดจำว่าต้องรับประทานยา</p> <p>ใช้ <b>"SMILE" SCALE</b></p>                                                                                                                                                         | <p><input type="checkbox"/><sub>5</sub> ง่ายมาก</p> <p><input type="checkbox"/><sub>4</sub> ง่าย</p> <p><input type="checkbox"/><sub>3</sub> ธรรมดา</p> <p><input type="checkbox"/><sub>2</sub> ยาก</p> <p><input type="checkbox"/><sub>1</sub> ยากมาก</p>                                                                                                                                                         |                                                |
| C.8  | <p>ท่านต้องคอยเตือนเด็กให้รับประทานยาหรือไม่</p>                                                                                                                                                                                                                    | <p><input type="checkbox"/><sub>1</sub> ไม่เคย .....</p> <p><input type="checkbox"/><sub>2</sub> บางครั้ง</p> <p><input type="checkbox"/><sub>3</sub> บ่อยๆ</p> <p><input type="checkbox"/><sub>4</sub> เป็นประจำเนื่องจากผม/ดิฉันเป็นผู้ที่รับผิดชอบเรื่องการรับประทานยาของเด็ก</p>                                                                                                                               | → C11                                          |
| C.9  | <p>เวลาที่เตือนให้เด็กรับประทานยา เด็กปฏิบัติตามหรือไม่</p>                                                                                                                                                                                                         | <p><input type="checkbox"/><sub>1</sub> ไม่</p> <p><input type="checkbox"/><sub>2</sub> ใช่</p> <p><input type="checkbox"/><sub>98</sub> ไม่ทราบ</p>                                                                                                                                                                                                                                                               |                                                |
| C.10 | <p>ท่านประเมินความร่วมมือในการรับประทานยาของเด็กเป็นอย่างไร</p> <p>ใช้ <b>"SMILE" SCALE</b></p>                                                                                                                                                                     | <p><input type="checkbox"/><sub>5</sub> ดีมาก</p> <p><input type="checkbox"/><sub>4</sub> ดี</p> <p><input type="checkbox"/><sub>3</sub> พอใช้</p> <p><input type="checkbox"/><sub>2</sub> แย่</p> <p><input type="checkbox"/><sub>1</sub> แย่มาก</p>                                                                                                                                                              |                                                |
| C.11 | <p>ท่านช่วยบอกว่าสถานการณ์แบบไหนที่เด็กอาจลืมรับประทานยามากที่สุด</p> <p>ข้อเสนอแนะ:</p>                                                                                                                                                                            | <p><input type="checkbox"/><sub>0</sub> ไม่เคยลืม</p> <p><input type="checkbox"/><sub>1</sub> ปวด</p> <p><input type="checkbox"/><sub>2</sub> ยุ่งมากๆ</p> <p><input type="checkbox"/><sub>3</sub> ไม่ได้กลับบ้าน</p> <p><input type="checkbox"/><sub>4</sub> ช่วงเทศกาล/วันหยุด/ไปเข้าค่าย</p> <p><input type="checkbox"/><sub>5</sub> อยู่กับเพื่อน</p> <p><input type="checkbox"/><sub>6</sub> อื่นๆ (ระบุ)</p> |                                                |
| C.12 | <p>เด็กเคยเข้ารับการรักษาในโรงพยาบาลเป็นเวลาอย่างน้อย 1 คืนอันเนื่องจากปัญหาสุขภาพ หรือไม่</p> <p>ถ้าเคยเหตุผลที่กล่าวถึงอย่างเป็นธรรมชาติ ระบุ:</p>                                                                                                                | <p><input type="checkbox"/><sub>1</sub> ไม่ ข้ามไปข้อ C.16</p> <p><input type="checkbox"/><sub>2</sub> ใช่</p> <p>.....</p>                                                                                                                                                                                                                                                                                        |                                                |
| C.13 | <p>ถ้าเคย กี่ครั้ง</p>                                                                                                                                                                                                                                              | <p>ก่อนเริ่มรับการรักษาด้วยยาต้านไวรัส:  __ __ </p> <p>หลังจากรับการรักษาด้วยยาต้านไวรัส:  __ __ </p> <p>ในช่วง 12 เดือนที่ผ่านมา  __ __  <input type="checkbox"/><sub>98</sub> ไม่ทราบ</p>                                                                                                                                                                                                                        |                                                |
| C.14 | <p>ตารางเหตุการณ์ในชีวิต: สถานภาพทางด้านสุขภาพ (column 8)</p> <p>ท่านจัดลำดับสถานภาพทางด้านสุขภาพตลอดช่วงชีวิตของเด็กอย่างไร</p> <p>ใช้ <b>"SMILE" SCALE</b></p> <p>กรอกข้อมูลสถานภาพทางด้านสุขภาพตลอดช่วงชีวิตของเด็กแบบเจาะจง ก่อนและหลังรับประทานยาต้านไวรัส</p> | <p><input type="checkbox"/><sub>5</sub> ดีมาก</p> <p><input type="checkbox"/><sub>4</sub> ดี</p> <p><input type="checkbox"/><sub>3</sub> พอใช้</p> <p><input type="checkbox"/><sub>2</sub> แย่</p> <p><input type="checkbox"/><sub>1</sub> แย่มาก</p>                                                                                                                                                              | <p>เหตุการณ์ในชีวิต</p> <p><b>column 8</b></p> |



## การเปิดเผยสถานะการติดเชื้อเอช ไอ วี

|                                                                                |                                                                                                                                                          |                                                                                                                                                                                                                                                                                                                                                                                                                                                       |                    |
|--------------------------------------------------------------------------------|----------------------------------------------------------------------------------------------------------------------------------------------------------|-------------------------------------------------------------------------------------------------------------------------------------------------------------------------------------------------------------------------------------------------------------------------------------------------------------------------------------------------------------------------------------------------------------------------------------------------------|--------------------|
| C.1<br>5                                                                       | เด็กทราบหรือไม่ว่าตัวเองติดเชื้อเอช ไอ วี<br>ข้อคิดเห็นที่ตอบตามธรรมชาติ:.....<br>.....<br>.....                                                         | <input type="checkbox"/> <sub>1</sub> ทราบ<br><input type="checkbox"/> <sub>2</sub> ไม่ทราบ<br><input type="checkbox"/> <sub>3</sub> ไม่แน่ใจ                                                                                                                                                                                                                                                                                                         |                    |
| C.1<br>6                                                                       | เด็กได้รับการบอกสถานะการติดเชื้อเอช ไอ วี<br>ของตนเองหรือไม่<br>ข้อคิดเห็นที่ตอบตามธรรมชาติ:.....<br>.....<br>.....                                      | <input type="checkbox"/> <sub>1</sub> ใช่<br><input type="checkbox"/> <sub>2</sub> ไม่ แต่เด็กทราบเองเมื่อเด็กโตขึ้น → D1<br><input type="checkbox"/> <sub>3</sub> ไม่ → D1                                                                                                                                                                                                                                                                           |                    |
| C.1<br>7                                                                       | ตารางเหตุการณ์ในชีวิต: โรค (Column 7)<br>ท่านช่วยบอกว่าเด็กทราบสถานะการติดเชื้อของตนเองเมื่อเด็กอ<br>ายุเท่าไรหรือเมื่อช่วงอายุเท่าไร                    | <input type="checkbox"/> ไม่เคย → D1<br>เมื่อ  __ __ ปี<br>หรือ<br>ระหว่าง  __ __  และ  __ __ ปี<br><input type="checkbox"/> ไม่ทราบ                                                                                                                                                                                                                                                                                                                  | Column<br>7<br>โรค |
| กรอกอายุของเด็กเมื่อเด็กมีอาการแสดงของการติดเชื้อเอช ไอ วี ในคอลัมน์ที่ 7: โรค |                                                                                                                                                          | DISCLOSE                                                                                                                                                                                                                                                                                                                                                                                                                                              |                    |
| C.1<br>8                                                                       | ใครบอกเด็กเกี่ยวกับสถานะการติดเชื้อเอช ไอ วี                                                                                                             | .....                                                                                                                                                                                                                                                                                                                                                                                                                                                 | _ _                |
| C.<br>19                                                                       | หากเด็กได้รับการบอกกล่าวอย่างเป็นทางการแล้ว<br>เพราะเหตุใดจึงบอกเด็ก ณ.ขณะนั้น<br>ข้อคิดเห็น: .....<br>.....<br>.....                                    | <input type="checkbox"/> <sub>1</sub> อายุเหมาะสม<br><input type="checkbox"/> <sub>2</sub> ถูกถามเกี่ยวกับโรค/การรักษาที่เด็กได้รับ<br><input type="checkbox"/> <sub>3</sub> ได้ยินมาจากเพื่อนหรือจากที่โรงเรียน<br><input type="checkbox"/> <sub>4</sub> มารดา/บิดา เจ็บป่วย/เสียชีวิต<br><input type="checkbox"/> <sub>5</sub> เด็กป่วย<br><input type="checkbox"/> <sub>6</sub> อื่นๆ ระบุ:.....<br><input type="checkbox"/> <sub>98</sub> ไม่ทราบ |                    |
| C.<br>20                                                                       | ปฏิกิริยาของเด็ก<br>ในขณะที่บอกให้ทราบเกี่ยวกับเรื่องนี้เป็นอย่างไ<br>ข้อคิดเห็น: .....<br>.....<br>.....                                                | <input type="checkbox"/> <sub>1</sub> ผ่อนคลาย<br><input type="checkbox"/> <sub>2</sub> หดหู่ หมดกำลังใจ<br><input type="checkbox"/> <sub>3</sub> โกรธ<br><input type="checkbox"/> <sub>4</sub> ไม่ตอบสนองใดๆ<br><input type="checkbox"/> <sub>5</sub> อื่นๆ ระบุ:.....<br><input type="checkbox"/> <sub>98</sub> ไม่ทราบ                                                                                                                             |                    |
| C.<br>21                                                                       | ถ้าเด็กกำลังรับการรักษาด้วยยาต้านไวรัสในขณะนั้น<br>การเปิดเผยสถานภาพการติดเชื้อ<br>มีผลกระทบต่อความร่วมมือในการรักษาหรือไม่<br>ข้อคิดเห็น:.....<br>..... | <input type="checkbox"/> <sub>1</sub> ไม่มีผลกระทบ<br><input type="checkbox"/> <sub>2</sub> ความร่วมมือในการรักษาเพิ่มขึ้น<br><input type="checkbox"/> <sub>3</sub> ความร่วมมือในการรักษาลดลง<br><input type="checkbox"/> <sub>4</sub> ไม่ทราบ                                                                                                                                                                                                        |                    |



## หมวด E: รายได้ครัวเรือน

|                                                      |                                                                                                                                                                  |                                                                                                                                                                                                                |                                                                                                   |                                                                                                |                                                                                                        |       |
|------------------------------------------------------|------------------------------------------------------------------------------------------------------------------------------------------------------------------|----------------------------------------------------------------------------------------------------------------------------------------------------------------------------------------------------------------|---------------------------------------------------------------------------------------------------|------------------------------------------------------------------------------------------------|--------------------------------------------------------------------------------------------------------|-------|
| E.1                                                  | ท่านมีรายได้ประจำจากการทำงานหรือไม่                                                                                                                              | <input type="checkbox"/> <sub>1</sub> ไม่<br><input type="checkbox"/> <sub>2</sub> ใช่                                                                                                                         |                                                                                                   |                                                                                                |                                                                                                        | ⇒QE.3 |
| E.2                                                  | รายได้ของท่านโดยประมาณต่อเดือนหรือต่อวัน                                                                                                                         | _ _ _ ,  _ _ _  บาท<br><input type="checkbox"/> <sub>1</sub> ต่อเดือน (เดือนที่ผ่านมา)<br><input type="checkbox"/> <sub>2</sub> ต่อวัน<br>ถ้ามีรายได้ต่อวัน<br>ระบุว่าทำงานกี่วันในเดือนในเดือนที่ผ่านมา:  _ _ |                                                                                                   |                                                                                                |                                                                                                        |       |
| E.3                                                  | <b>รายได้ครัวเรือน</b><br>ท่านบอกว่ามีสมาชิกจำนวน _____ คน ที่อาศัยอยู่ในบ้านของท่าน<br>ท่านช่วยบอกรายได้ครัวเรือนโดยประมาณต่อเดือนหรือต่อปีของแต่ละคนได้หรือไม่ |                                                                                                                                                                                                                |                                                                                                   |                                                                                                | แบบสำรวจ<br>ด้านครัวเรี<br>น                                                                           |       |
| <b>กรอกข้อมูลในคอลัมน์ E.3 แบบสำรวจด้านครัวเรือน</b> |                                                                                                                                                                  |                                                                                                                                                                                                                |                                                                                                   |                                                                                                |                                                                                                        |       |
| E.4                                                  | โดยปกติ<br>ท่านได้รับเงินสนับสนุนจากรัฐบาลเป็นประจำสม่ำเสมอหรือไม่                                                                                               | ท่าน<br><input type="checkbox"/> <sub>1</sub> ใช่<br><input type="checkbox"/> <sub>2</sub> ไม่                                                                                                                 | คู่ครอง<br><input type="checkbox"/> <sub>1</sub> ใช่<br><input type="checkbox"/> <sub>2</sub> ไม่ | เด็ก<br><input type="checkbox"/> <sub>1</sub> ใช่<br><input type="checkbox"/> <sub>2</sub> ไม่ | ผู้ร่วมอาศัย<br><input type="checkbox"/> <sub>1</sub> ใช่<br><input type="checkbox"/> <sub>2</sub> ไม่ |       |
|                                                      |                                                                                                                                                                  | จำนวน (บาท)                                                                                                                                                                                                    |                                                                                                   |                                                                                                |                                                                                                        |       |
|                                                      |                                                                                                                                                                  | _ _ _                                                                                                                                                                                                          | _ _ _                                                                                             | _ _ _                                                                                          | _ _ _                                                                                                  |       |
| E.5                                                  | ท่านหรือครอบครัวของท่านได้รับการช่วยเหลือ<br>สนับสนุนจากบุคคลอื่นหรือจากองค์กรส่วนท้องถิ่นใดเป็นประจำสม่ำเสมอหรือไม่                                             | <input type="checkbox"/> <sub>1</sub> ใช่<br><input type="checkbox"/> <sub>2</sub> ไม่                                                                                                                         |                                                                                                   |                                                                                                | ⇒QE. 7                                                                                                 |       |
| E.6                                                  | ถ้าใช่ ท่านได้รับจำนวนเท่าไรต่อเดือน                                                                                                                             | _ _ _ _ _  บาท                                                                                                                                                                                                 |                                                                                                   |                                                                                                |                                                                                                        |       |
| E.7                                                  | ปัจจุบันคุณมีสิ่งของตามรายการข้างล่างนี้เป็นของตัวเองหรือไม่                                                                                                     | ไม่มี                                                                                                                                                                                                          | เป็นของตน                                                                                         | เป็นของญาติ                                                                                    | จ้าง/กู้ยืม                                                                                            |       |
|                                                      | บ้าน                                                                                                                                                             | <input type="checkbox"/> <sub>0</sub>                                                                                                                                                                          | <input type="checkbox"/> <sub>1</sub>                                                             | <input type="checkbox"/> <sub>2</sub>                                                          | <input type="checkbox"/> <sub>3</sub>                                                                  |       |
|                                                      | ที่ดิน                                                                                                                                                           | <input type="checkbox"/> <sub>0</sub>                                                                                                                                                                          | <input type="checkbox"/> <sub>1</sub>                                                             | <input type="checkbox"/> <sub>2</sub>                                                          | <input type="checkbox"/> <sub>3</sub>                                                                  |       |
|                                                      | รถยนต์                                                                                                                                                           | <input type="checkbox"/> <sub>0</sub>                                                                                                                                                                          | <input type="checkbox"/> <sub>1</sub>                                                             | <input type="checkbox"/> <sub>2</sub>                                                          | <input type="checkbox"/> <sub>3</sub>                                                                  |       |
|                                                      | จักรยานยนต์                                                                                                                                                      | <input type="checkbox"/> <sub>0</sub>                                                                                                                                                                          | <input type="checkbox"/> <sub>1</sub>                                                             | <input type="checkbox"/> <sub>2</sub>                                                          | <input type="checkbox"/> <sub>3</sub>                                                                  |       |
|                                                      | โทรทัศน์                                                                                                                                                         | <input type="checkbox"/> <sub>0</sub>                                                                                                                                                                          | <input type="checkbox"/> <sub>1</sub>                                                             | <input type="checkbox"/> <sub>2</sub>                                                          | <input type="checkbox"/> <sub>3</sub>                                                                  |       |
|                                                      | ตู้เย็น                                                                                                                                                          | <input type="checkbox"/> <sub>0</sub>                                                                                                                                                                          | <input type="checkbox"/> <sub>1</sub>                                                             | <input type="checkbox"/> <sub>2</sub>                                                          | <input type="checkbox"/> <sub>3</sub>                                                                  |       |
|                                                      | โทรศัพท์มือถือ                                                                                                                                                   | <input type="checkbox"/> <sub>0</sub>                                                                                                                                                                          | <input type="checkbox"/> <sub>1</sub>                                                             | <input type="checkbox"/> <sub>2</sub>                                                          | <input type="checkbox"/> <sub>3</sub>                                                                  |       |

|      |                                                  |                                                                                                                                                                                                                                                                                                  |
|------|--------------------------------------------------|--------------------------------------------------------------------------------------------------------------------------------------------------------------------------------------------------------------------------------------------------------------------------------------------------|
| E.8a | หลักประกันสุขภาพของท่านคืออะไร<br>ข้อเสนอแนะ :   | <input type="checkbox"/> 0 ไม่มี<br><input type="checkbox"/> 1 หลักประกันสุขภาพถ้วนหน้า<br><input type="checkbox"/> 2 ประกันสังคม<br><input type="checkbox"/> 3 กองทุนเงินทดแทนคนงาน<br><input type="checkbox"/> 4 การเบิกค่ารักษาพยาบาลของข้าราชการ<br><input type="checkbox"/> 5 อื่นๆ (ระบุ): |
| E.9  | หลักประกันสุขภาพของบุตร/หลานของท่านคืออะไร       | <input type="checkbox"/> 0 ไม่มี<br><input type="checkbox"/> 1 หลักประกันสุขภาพถ้วนหน้า<br><input type="checkbox"/> 2 ประกันสังคม<br><input type="checkbox"/> 3 กองทุนเงินทดแทนคนงาน<br><input type="checkbox"/> 4 การเบิกค่ารักษาพยาบาลของข้าราชการ<br><input type="checkbox"/> 5 อื่นๆ (ระบุ): |
| E.10 | ท่านจ่ายค่ายาต้านไวรัสของบุตร/หลานของท่านหรือไม่ | <input type="checkbox"/> 1 ใช่<br><input type="checkbox"/> 2 ไม่                                                                                                                                                                                                                                 |

## หมวด F: รูปแบบการดำเนินชีวิต

|      |                                                                                                                                                   |                                                                                                                                                                                                                |        |
|------|---------------------------------------------------------------------------------------------------------------------------------------------------|----------------------------------------------------------------------------------------------------------------------------------------------------------------------------------------------------------------|--------|
|      | หัวข้อนี้เป็นส่วนสุดท้ายของการสัมภาษณ์<br>ทางโครงการจะถามท่านเล็กน้อยเกี่ยวกับรูปแบบการดำเนินชีวิตของท่านและถามว่าท่านเข้าใจเด็กที่ท่านดูแลแค่ไหน |                                                                                                                                                                                                                |        |
| F.1  | ท่านเป็นสมาชิกของกลุ่มที่ให้การสนับสนุนกลุ่มใดซึ่ง<br>สนับสนุนผู้ที่อาศัยอยู่ร่วมกับเอช ไอ วี<br>หรือผู้ดูแลเด็กที่ติดเชื้อเอช ไอ วีหรือไม่       | <input type="checkbox"/> 1 ใช่ ระบุ<br><input type="checkbox"/> 2 ไม่                                                                                                                                          |        |
| F.2  | ท่านนับถือศาสนาหรือไม่                                                                                                                            | <input type="checkbox"/> 1 ใช่<br><input type="checkbox"/> 2 ไม่                                                                                                                                               | ⇒Q F.4 |
| F.3  | ถ้าใช่ ท่านนับถือศาสนาอะไร                                                                                                                        | <input type="checkbox"/> 1 พุทธ<br><input type="checkbox"/> 2 คริสต์<br><input type="checkbox"/> 3 อิสลาม<br><input type="checkbox"/> 4 อื่นๆ (ระบุ: )                                                         |        |
| F.4  | ท่านคิดว่าสถานการณ์ด้านการเงินในปัจจุบันของท่านเป็นอย่างไร<br>ใช้ <b>"SMILE" SCALE</b><br>ข้อเสนอแนะ:                                             | <input type="checkbox"/> 1 ลำบากมาก<br><input type="checkbox"/> 2 ลำบาก<br><input type="checkbox"/> 3 ธรรมดา<br><input type="checkbox"/> 4 ดี<br><input type="checkbox"/> 5 ดีมาก                              |        |
| F.5  | ในปัจจุบันท่านคิดว่าท่านมีความสุขแค่ไหน<br>ใช้ <b>"SMILE" SCALE</b><br>ข้อเสนอแนะ:                                                                | <input type="checkbox"/> 1 ไม่มีความสุขเลย<br><input type="checkbox"/> 2 ไม่มีความสุข<br><input type="checkbox"/> 3 ปานกลาง<br><input type="checkbox"/> 4 มีความสุข<br><input type="checkbox"/> 5 มีความสุขมาก |        |
| F.5b | ท่านให้คะแนนความสามารถด้านสติปัญญาของเด็กแค่ไหน<br>ใช้ <b>"SMILE" SCALE</b><br>ข้อคิดเห็น: .....                                                  | <input type="checkbox"/> 1 ต่ำมาก<br><input type="checkbox"/> 2 ต่ำ<br><input type="checkbox"/> 3 ปานกลาง<br><input type="checkbox"/> 4 ดี<br><input type="checkbox"/> 5 ดีมาก                                 |        |
| F.6  | ท่านคิดว่าเด็กมีความสุขแค่ไหน<br>ใช้ <b>"SMILE" SCALE</b><br>ข้อคิดเห็น: .....                                                                    | <input type="checkbox"/> 1 ไม่มีความสุขเลย<br><input type="checkbox"/> 2 ไม่มีความสุข<br><input type="checkbox"/> 3 ปานกลาง<br><input type="checkbox"/> 4 มีความสุข<br><input type="checkbox"/> 5 มีความสุขมาก |        |

|      |                                                                                                                  |                                                                                                                                                                                       |                                                                                                                                                                                                                                                                                                                                                                                                                                 |
|------|------------------------------------------------------------------------------------------------------------------|---------------------------------------------------------------------------------------------------------------------------------------------------------------------------------------|---------------------------------------------------------------------------------------------------------------------------------------------------------------------------------------------------------------------------------------------------------------------------------------------------------------------------------------------------------------------------------------------------------------------------------|
| F.7  | ท่านคิดว่าเด็ก<br>ใช้ <b>"SMILE" SCALE</b><br>ข้อคิดเห็น: .....<br>.....                                         | <input type="checkbox"/> 1 ดีอย่างมาก<br><input type="checkbox"/> 2 ดี<br><input type="checkbox"/> 3 ธรรมดา<br><input type="checkbox"/> 4 ดิ<br><input type="checkbox"/> 5 ดิอย่างมาก |                                                                                                                                                                                                                                                                                                                                                                                                                                 |
| F.9  | ท่านประเมินด้านการสื่อสารระหว่างท่านกับเด็กเป็นอย่างไร<br>ใช้ <b>"SMILE" SCALE</b><br>ข้อคิดเห็น: .....<br>..... | <input type="checkbox"/> 1 ยากมาก<br><input type="checkbox"/> 2 ยาก<br><input type="checkbox"/> 3 ปานกลาง<br><input type="checkbox"/> 4 ง่าย<br><input type="checkbox"/> 5 ง่ายมาก    |                                                                                                                                                                                                                                                                                                                                                                                                                                 |
| F.8  | เด็กช่วยท่านทำงานบ้านหรือไม่<br><br>(ตอบได้มากกว่าหนึ่งข้อ)<br>ข้อคิดเห็น: .....<br>.....<br>.....               | <input type="checkbox"/> 1 ไม่                                                                                                                                                        | <input type="checkbox"/> 2 ใช้ระบุ<br><br><input type="checkbox"/> 1 ทำความสะอาดบ้าน<br><input type="checkbox"/> 2 ซักรีด<br><input type="checkbox"/> 3 ทำอาหาร<br><input type="checkbox"/> 4 ดูแลญาติที่อายุน้อยกว่า<br><input type="checkbox"/> 5 ล้างจาน<br><input type="checkbox"/> 6 ซักรีดเสื้อผ้า<br><input type="checkbox"/> 7 ช่วยพ่อแม่ทำงานต่างๆ (งานในร้าน ในไร่ อื่นๆ)<br><input type="checkbox"/> 8 อื่นๆ (ระบุ): |
| F.10 | ท่านมีความขัดแย้งกับเด็กหรือไม่<br>ข้อคิดเห็น: .....<br>.....                                                    | <input type="checkbox"/> 1 ตลอดเวลา<br><input type="checkbox"/> 2 บางครั้ง<br><input type="checkbox"/> 3 น้อยมาก<br><input type="checkbox"/> 4 ไม่เคย                                 |                                                                                                                                                                                                                                                                                                                                                                                                                                 |
| F.11 | ในกรณีที่มีความขัดแย้ง อะไรคือสาเหตุหลัก                                                                         | ....<br>....                                                                                                                                                                          |                                                                                                                                                                                                                                                                                                                                                                                                                                 |
| F.13 | ท่านมีข้อเสนอแนะเกี่ยวกับแบบสอบถามนี้หรือไม่:                                                                    | ....<br>....                                                                                                                                                                          |                                                                                                                                                                                                                                                                                                                                                                                                                                 |

ขอขอบคุณเป็นอย่างสูงสำหรับความร่วมมือของคุณ แม้คุณจะรู้สึกวบางคำถามค่อนข้างเป็นเรื่องส่วนตัว แต่คุณควรทราบไว้ว่าคำตอบของคุณนั้นสำคัญต่อการทำความเข้าใจสถานการณ์ของวัยรุ่นผู้ติดเชื้อเอช ไอ วี ในประเทศไทยให้ดีขึ้น และสำคัญต่อการกำหนดโครงการเพื่อพัฒนาสถานการณ์ของผู้ติดเชื้อเอช ไอ วี ในระดับชาติต่อไป

## I. ความเห็นของผู้สัมภาษณ์

|     |                                                                        |                                                                                                                                                                                                                                                                                                                                                                                                                                                                                                                                       |
|-----|------------------------------------------------------------------------|---------------------------------------------------------------------------------------------------------------------------------------------------------------------------------------------------------------------------------------------------------------------------------------------------------------------------------------------------------------------------------------------------------------------------------------------------------------------------------------------------------------------------------------|
|     | เวลาสิ้นสุดการบันทึกข้อมูล:  __ __  นาฬิกา  __ __  นาที                |                                                                                                                                                                                                                                                                                                                                                                                                                                                                                                                                       |
| I.1 | การสัมภาษณ์ดำเนินไปอย่างไร                                             | <input type="checkbox"/> <sub>1</sub> ราบรื่น ไม่มีการหยุดชะงักใดๆ<br><input type="checkbox"/> <sub>2</sub> ผู้ให้สัมภาษณ์แสดงอาการว่า<br>อาจจะยุติการสัมภาษณ์<br><input type="checkbox"/> <sub>3</sub> มีการหยุดชะงักหลายครั้ง                                                                                                                                                                                                                                                                                                       |
| I.2 | อธิบายเกี่ยวกับผู้ให้สัมภาษณ์:<br>(สามารถเลือกตอบได้มากกว่าหนึ่งคำตอบ) | <input type="checkbox"/> <sub>1</sub> ผ่อนคลาย<br><input type="checkbox"/> <sub>2</sub> ปานกลาง<br><input type="checkbox"/> <sub>3</sub> มีความรู้สึกทางอารมณ์ง่าย<br><input type="checkbox"/> <sub>4</sub> คุณาฬิกาตลอดเวลา<br><input type="checkbox"/> <sub>5</sub> มีความลำบากในการเข้าใจคำถาม<br><input type="checkbox"/> <sub>6</sub> มีความลำบากในการแสดงความคิดออกมาเป็นคำ<br><input type="checkbox"/> <sub>7</sub> มีความลำบากในการจำ<br>หรือระบุนวันที่เกิดเหตุการณ์<br><input type="checkbox"/> <sub>8</sub> ร่างกายอ่อนล้า |
| I.3 | คำตอบค่อนข้าง                                                          | <input type="checkbox"/> <sub>1</sub> เชื่อถือได้มาก<br><input type="checkbox"/> <sub>2</sub> เชื่อถือได้<br><input type="checkbox"/> <sub>3</sub> ไม่น่าเชื่อถือ<br><input type="checkbox"/> <sub>4</sub> เชื่อถือไม่ได้เลย<br><input type="checkbox"/> <sub>98</sub> ไม่ทราบ                                                                                                                                                                                                                                                        |
